# Supplementary material for: Dissecting Acute Drug‐Induced Hepatotoxicity and Therapeutic Responses of Steatotic Liver Disease Using Primary Mouse Liver and Blood Cells in a Liver‐On‐A‐Chip Model
Source: PubMed Central journal article supplement (PMC11321671; doi:10.1002/advs.202403516), 2024-06-13
Supplement: ADVS-11-2403516-s001.pdf [file ADVS-11-2403516-s001.pdf]

## Supporting Information

for *Adv. Sci.*, DOI 10.1002/adv.202403516

Dissecting Acute Drug-Induced Hepatotoxicity and Therapeutic Responses of Steatotic Liver Disease Using Primary Mouse Liver and Blood Cells in a Liver-On-A-Chip Model

*Hanyang Liu, Guo Yin, Marlene Sophia Kohlhepp, Fabian Schumacher, Jana Hundertmark, Mohamed I. Abdelwahab Hassan, Felix Heymann, Tobias Puengel, Burkhard Kleuser, Alexander Sandy Mosig, Frank Tacke and Adrien Guillot\**

## Supporting Information

## Title

Dissecting pathomechanisms and therapeutic responses of steatotic liver disease using primary mouse liver and blood cells in a liver-on-a-chip model

*Hanyang Liu<sup>1</sup>, Guo Yin<sup>1</sup>, Marlene Sophia Kohlhepp<sup>1</sup>, Fabian Schumacher<sup>2</sup>, Jana Hundertmark<sup>1</sup>, Mohamed I Abdelwahab Hassan<sup>3</sup>, Felix Heymann<sup>1</sup>, Tobias Puengel<sup>1</sup>, Burkhard Kleuser<sup>2</sup>, Alexander S. Mosig<sup>3</sup>, Frank Tacke<sup>1</sup>, Adrien Guillot<sup>1,\*</sup>*

1. Charité Universitätsmedizin Berlin, Campus Virchow-Klinikum and Campus Charité Mitte, Department of Hepatology & Gastroenterology, Berlin, Germany
2. Freie Universität Berlin, Institute of Pharmacy, Königin-Luise-Str. 2+4, Berlin, Germany
3. Institute of Biochemistry II, Center for Sepsis Control and Care, Jena University Hospital, Germany

**1. Supplementary materials and methods****1.1. Materials for liver and blood primary cell isolation and culture****1.1.1. Enzymes/chemicals**

- 1) Protease (Sigma-Aldrich, cat. no. P5147)
- 2) Collagenase type 4 (CellSystems, cat. no. LS004186)
- 3) DNase I (Roche, cat. no. 10 104 159 001)
- 4) Nycodenz (Accurate Chemical, cat. no. 1002424)
- 5) Sodium chloride (NaCl; Sigma-Aldrich, cat. no. S3014)
- 6) Potassium chloride (KCl; Sigma-Aldrich, cat. no. P9333)
- 7) Sodium Phosphate monobasic monohydrate ( $\text{NaH}_2\text{PO}_4 \cdot \text{H}_2\text{O}$ ; Fisher Scientific, cat. no. S369)
- 8) Sodium phosphate ( $\text{Na}_2\text{HPO}_4$ ; Sigma-Aldrich, cat. no. S9763)
- 9) HEPES (Sigma-Aldrich, cat. no. H4034)
- 10) Sodium bicarbonate ( $\text{NaHCO}_3$ ; Sigma-Aldrich, cat. no. S5761)
- 11) EGTA (Sigma-Aldrich, cat. no. E4378)
- 12) D-(+)-Glucose (Sigma-Aldrich, cat. no. G8270)
- 13) Calcium chloride dihydrate ( $\text{CaCl}_2 \cdot 2\text{H}_2\text{O}$ ; Sigma-Aldrich, cat. no. C7902)
- 14) Magnesium chloride hexahydrate ( $\text{MgCl}_2 \cdot 6\text{H}_2\text{O}$ ; Sigma-Aldrich, cat. no. 930970)
- 15) Magnesium sulfate heptahydrate ( $\text{MgSO}_4 \cdot 7\text{H}_2\text{O}$ ; Sigma-Aldrich, cat. no. 230391)
- 16) Potassium phosphate monobasic ( $\text{KH}_2\text{PO}_4$ ; Sigma-Aldrich, cat. no. 60229)
- 17) Albumin from bovine serum, BSA (Sigma-Aldrich, cat. no. A9430)
- 18) Paracetamol (Sigma-Aldrich, cat. no. BP371)
- 19) Palmitic acid, PA (Sigma-Aldrich, cat. no. P0500)
- 20) Oleic acid, OA (Sigma-Aldrich, cat. no. O1008)
- 21) Lanifibranor (Biozol, cat. no. 927961-18-0)
- 22) Resmetirom (Biozol, cat. no. 10033494)
- 23) Paraformaldehyde, PFA ( $\text{HO}(\text{CH}_2\text{O})_n\text{H}$ , Sigma-Aldrich, cat. no. 158127)
- 24)

**1.1.2. Solutions**

- 1) Dulbecco's phosphate-buffered saline, DPBS (Gibco, cat. no. 14190144)
- 2) Phosphate-buffered saline, PBS (Gibco, cat. no. 70011044)
- 3) Hanks' Balanced Salt Solution, HBSS, Calcium, Magnesium (Gibco, cat. no. 24020117)
- 4) William's E medium (Gibco, cat. no. W1878-500ML)
- 5) Fetal bovine serum, FBS (Gibco, cat. no. A4736201)
- 6) Normal Goat Serum, NGS (10%) (ThermoFisher, cat. no. 50062Z)
- 7) Primary hepatocyte maintenance supplements (Gibco, cat. no. CM4000)
- 8) Lysing buffer (10X) (BioLegend, cat. no. 420301)
- 9) Collagen I, rat tail (ThermoFisher, cat. no. A1048301)
- 10) Acetic acid solution (CH<sub>3</sub>CO<sub>2</sub>H, Sigma-Aldrich, cat. no. 45754)
- 11) Percoll-100% (Sigma-Aldrich, cat. no. P1644)
- 12) Triton X-100 solution (Sigma-Aldrich, cat. no. 93443)
- 13) Isoflurane (CP-pharma, cat. no. 798-932)
- 14) Ethanol solution 70 % (ThermoFisher, cat. no. 15542393)
- 15) BD Pharm Lyse™ Lysing Buffer (10X) (BD, cat. no. 555899)
- 16) EGTA buffer: Prepare the solution by dissolving the components of the recipe given below in 1 L of ddH<sub>2</sub>O. Adjust the pH to 7.4 and filter the solution through a 0.2- $\mu$ m bottle-top filter. The constituted solution can be stored at 4°C for up to 6 months.

| <b>Reagent</b>                                     | <b>Final concentration<br/>(mg/liter)</b> |
|----------------------------------------------------|-------------------------------------------|
| NaCl                                               | 8,000                                     |
| KCl                                                | 400                                       |
| NaH <sub>2</sub> PO <sub>4</sub> ·H <sub>2</sub> O | 88.17                                     |
| Na <sub>2</sub> HPO <sub>4</sub>                   | 120.45                                    |
| HEPES                                              | 2,380                                     |
| NaHCO <sub>3</sub>                                 | 350                                       |
| EGTA                                               | 190                                       |
| D-(+)-Glucose                                      | 900                                       |

- 17) Enzyme buffer: Prepare the solution by dissolving the components of the recipe given below in 1 L of ddH<sub>2</sub>O. Adjust the pH to 7.4 and filter the solution through a 0.2- $\mu$ m bottle-top filter. The ready-to-use solution can be stored at 4°C for up to 6 months.

| <b>Reagent</b>                                     | <b>Final concentration<br/>(mg/liter)</b> |
|----------------------------------------------------|-------------------------------------------|
| NaCl                                               | 8,000                                     |
| KCl                                                | 400                                       |
| NaH <sub>2</sub> PO <sub>4</sub> ·H <sub>2</sub> O | 88.17                                     |
| Na <sub>2</sub> HPO <sub>4</sub>                   | 120.45                                    |
| HEPES                                              | 2,380                                     |
| NaHCO <sub>3</sub>                                 | 350                                       |
| CaCl <sub>2</sub> ·2H <sub>2</sub> O               | 560                                       |

- 18) GBSS/A buffer: Prepare the solution by dissolving the components of the recipe given below in 1 L of ddH<sub>2</sub>O. Adjust the pH to 7.4 and filter the solution through a 0.2- $\mu$ m bottle-top filter. The constituted solution can be stored at 4°C for up to 6 months.

| <b>Reagent</b> | <b>Final concentration</b> |
|----------------|----------------------------|
|----------------|----------------------------|

|                                      | (mg/liter) |
|--------------------------------------|------------|
| KCl                                  | 370        |
| MgCl <sub>2</sub> ·6H <sub>2</sub> O | 210        |
| MgSO <sub>4</sub> ·7H <sub>2</sub> O | 70         |
| Na <sub>2</sub> HPO <sub>4</sub>     | 59.6       |
| KH <sub>2</sub> PO <sub>4</sub>      | 30         |
| Glucose                              | 991        |
| NaHCO <sub>3</sub>                   | 227        |
| CaCl <sub>2</sub> ·2H <sub>2</sub> O | 225        |

- 19) GBSS/B buffer: Add 8 g/L NaCl into 1 L of GBSS/A buffer described above to make GBSS/B buffer. Adjust the pH to 7.35 – 7.4 and filter the solution through a 0.2- $\mu$ m bottle-top filter. Constituted solution can be stored at 4°C for up to 6 months.
- 20) Digestion buffers: Prepare the solution by dissolving the components of the recipe given below. Buffers need to be freshly made for each experiment. Filter the buffer with a 0.22- $\mu$ m filter before use.
  - a) Digestion buffer I: Dissolve 4.4U collagenase type 4 in 50 mL enzyme buffer.
  - b) Digestion buffer II: Dissolve 4.4U collagenase type 4, 40  $\mu$ g DNase I and 4.5 mg pronase in 50 mL enzyme buffer.
- 21) DNase I solution: Dissolve 100 mg in 100 mL PBS to make 1 mg/mL solution.
- 22) Percoll-50% solution: Dissolve 10.8 mL Percoll-100% and 1.2 mL 10X-PBS in 14.5 mL 1X-PBS to make Percoll-50% solution. Mix it thoroughly.
- 23) Nycodenz solution: Dissolve 4.94 g nycodenz in 15ml GBSS/A buffer and filter it through a 0.22- $\mu$ m filter. Adjust the solution to 17ml. Optional: Add phenol red to indicate gradient layers.
- 24) Magnetic-activated cell sorting (MACS) buffer: Dissolve 250  $\mu$ g BSA and 37.2  $\mu$ g EDTA in 50 mL DPBS. Filter it through a 0.22- $\mu$ m filter. The constituted solution can be stored at 4°C for up to 2 weeks.
- 25) Collagen-coating buffer: Dissolve 660  $\mu$ L collagen-I in 50 mL DPBS containing 0.12% acetic acid. Filter it through a 0.22- $\mu$ m filter.
- 26) Blocking buffer: 5% normal goat serum and 0.3% Triton-X in DPBS.
- 27) Antibody buffer: 1% BSA and 0.3% Triton-X in DPBS.
- 28) Free fatty acid (FFA) solution: Dissolve PA or OA in DPBS containing 1% BSA, Ratios of PA and OA in FFA mixture can be adjusted for different perspectives. Final working FFA concentration is 30 mM.
- 29) Blocking buffer: Respectively dilute NGS and TritonX-100 into the DPBS to make 5% NGS and 0.3% TritonX-100 as final concentrations.
- 30) Antibody buffer: Respectively dilute BSA and TritonX-100 into the DPBS to make 1% BSA and 0.3% TritonX-100 as final concentrations.
- 31) VectaMount AQ Aqueous Mounting Medium (Vectorlabs, cat. no. H-5501)

### 1.1.3. Equipments

- 1) Microfluidic biochips were made from polybutylene terephthalate (PBT) and obtained from Dynamic42 GmbH (Jena, Germany). The pore diameter in the membrane separating the two chambers is 8 micrometer. The design and technical parameters have been previously described [1, 2].
- 2) Perfusion pump and tubing (Ismatec REGLO digital, MS-CA-4/12–100).
- 3) I.V catheter (JELCO 22G IV catheter)

- 4) Needle (0.9 X 40 mm BL/LB, Sterican)
- 5) Blood vessel clamp and scissors (Fine Science Tools, cat. no. 18039-45)
- 6) Bottle-top filter, 0.2  $\mu$ m 150 mL (Corning, cat. no. 431161)
- 7) Shakable water bath
- 8) Syringes: 3 and 20 ml
- 9) Sterile filter for syringe, 0.22  $\mu$ m (Millipore, cat. no. SLGP033RB)
- 10) 70- $\mu$ m strainer (Corning, cat. no. 352350)
- 11) Sterile pipettes: 5, 10 and 25 mL (ThermoFisher, cat. no. 170366N, 170356N and 170357N)
- 12) Falcon tubes, 15 mL (Corning, cat. no. 352095)
- 13) Falcon tubes, 50 mL (Corning, cat. no. 352070)
- 14) Sterile Petri dishes, 100 mm (Corning, cat. no. 70165-100)
- 15) MS columns (Miltenyi, cat. no. 130-042-201)
- 16) QuadroMACS Separator (Miltenyi, cat. no. 130-091-051)
- 17) AccuSpin 1R Centrifuge: Refrigerated (ThermoFisher, cat. no. 4168)
- 18) Mouse operation area (Styrofoam board, handmade)
- 19) InkJet Plus Microscope Slides (ThermoFisher, cat. no. 12-550-109)

#### 1.1.4. Antibodies, dyes and microbeads

All antibodies, dyes and microbeads that were used for fluorescence detection and cell sorting are listed in Table S2.

## 1.2. Methods

### 1.2.1. All-from-one mouse primary liver cell isolation (see the isolation procedures in Fig. 1A)

#### 1.2.1.1. Mouse liver perfusion and digestion

- 1) Before starting, pre-warm EGTA / enzyme buffers in the 42°C water bath; assemble tubes and catheters in the pump.  
**NOTE:** The temperature can be adjusted to ensure solutions perfused in mouse liver at mouse body temperature.
- 2) Sacrifice mice with the inhalation of isoflurane (60  $\mu$ g/g weight) for 3 min.
- 3) Fix mouse feet on the operating board, with the abdominal side up. Spray the abdomen with 70% ethanol to sterilize the area and wet the fur.
- 4) Open the abdominal cavity. Gently push intestines and colon to the right side, to expose the portal vein and inferior vena cava without punching into the organs.
- 5) Cannulate the portal vein using an I.V catheter. Perfuse the liver with EGTA buffer (40 mL) at a flow rate of 2 mL/min. Section the vena cava at a distal position to allow for perfusate clearance.  
**OPTIONAL:** For blood collection, insert a needle into inferior vena cava prior to starting perfusion. Start perfusion and collect blood with a 1.5 mL Eppendorf tube. Pull out the needle after collection.
- 6) **CAUTION:** It is critical to avoid bubbles during perfusion. Check for the presence of bubbles in the tubing prior to inserting the catheter. When switching perfusion reagents, make sure to stop the pump prior to transferring the tubing from one tube to the other.  
**NOTE:** The liver should appear homogeneously brighter within seconds after initiating the perfusion and cutting the inferior vena cava. If this is not the case, the perfusion is not optimal, and this will lead to difficulties during cell isolation.

**NOTE:** During the perfusion, it is necessary to press inferior vena cava with a vessel lamp for 30-40 sec to check the perfusion quality. Liver lobes get inflating rapidly.

- 7) Continue perfusion with the digestion buffer I (50 mL) at a flow rate of 2 mL/min.
- 8) Stop the perfusion and remove the catheter. Carefully remove the whole liver (dissect and discard the gallbladder).
- 9) Gently smash the liver tissue by vessel lamps for further isolation procedures..

**OPTIONAL:** Separate liver tissues if the multiple cell type isolation is required. For the HSC, KC and LSEC isolation, an extra digestion (in a 37°C incubator with the mild shaking level for 25 - 35 min) is necessary.

#### **1.2.1.2. Mouse primary hepatocyte isolation**

- 1) Pass the liver cell suspension through a 70- $\mu$ m strainer to a 50 mL Falcon tube. Fill up the tube with HBSS to 50 mL. Centrifuge the cell suspension at 4°C, 50 g for 5 min.
- 2) Aspirate the supernatant and resuspend the hepatocyte pellet in 50 mL HBSS. Centrifuge again the cell suspension at 4°C, 50 g for 5 min.

**CAUTION:** Keep the supernatant for MACS procedures if necessary.

- 3) Aspirate the supernatant and resuspend the hepatocyte pellet in 50 mL Percoll-50% solution. Centrifuge cells at 4°C, 400 g for 10 min.
- 4) Aspirate the supernatant and resuspend the hepatocyte pellet with 50 mL HBSS buffer. Centrifuge the hepatocytes at room temperature, 50 g for 10 min.
- 5) Resuspend the hepatocyte pellet in medium for counting and seeding.

#### **1.2.1.3. Mouse primary hepatic stellate cell isolation**

- 1) Filter the liver cell suspension through a 70- $\mu$ m strainer. Fill up the tube with GBSS/B buffer to 50ml. Centrifuge the cell suspension at 4°C, 580 g for 10 min.
- 2) Aspirate the supernatant until 10 mL remains in the tube. Add 100  $\mu$ L of DNase I solution and fill it up to 50 mL with GBSS/B buffer. Centrifuge again at 580g for 10 min at 4 °C.
- 3) Aspirate the supernatant until 10 mL remains in the tube. Add 100  $\mu$ L of DNase I solution and fill it up to 32 mL with GBSS/B buffer. Add 16 mL Nycodenz solution and mix thoroughly. Split 48 mL cell-Nycodenz suspension equally into four 15-ml Falcon tubes.
- 4) Gently overlay with cell-Nycodenz suspension with 1.5 mL of GBSS/B buffer using a 3-ml syringe with a 26-gauge needle attached. Centrifuge the suspension at 4 °C, 1,380g with no brake for 17 min.

**CAUTION:** Make sure to overlay the GBSS/B buffer gently above the cell-Nycodenz suspension to create a discontinuous gradient. A clear separation should be observed.

- 5) Use a 5-ml pipette to collect the cells and transfer them into a new 50-ml Falcon tube. Resuspend the cell pellets by MACS buffer for the magnetic cell sorting.

**OPTIONAL:** Repeat the procedure (3 – 5) with cell pellets to obtain more cells.

- 6) Fill up the Falcon tube to 50 mL with GBSS/B buffer. Gently resuspend the collected HSCs. Centrifuge at 4 °C, 580g for 10 min.
- 7) Resuspend the cell pellet in medium for counting and seeding.

#### **1.2.1.4. Magnetic cell sorting (for KCs and LSECs)**

- 1) Centrifuge cell suspension at 4°C, 400 g for 10 min.
- 2) Discard supernatant and resuspend in 90  $\mu$ L MACS buffer per  $10^7$  cells.
- 3) Respectively add 10  $\mu$ L / $10^7$  cells magnetic beads (Anti-F4/80 for KCs or Anti-CD146 for LSECs) into the cell suspension. Mix well and incubate on ice for 15 min.

- 4) Add 900  $\mu\text{L}$  MACS buffer per  $10^7$  cells and centrifuge at  $4^\circ\text{C}$ , 300 g for 10 min.
- 5) Discard the supernatant and resuspend cells in 500  $\mu\text{L}$  of MACS buffer. Place the MS column in the magnetic separator and rinse it with 500  $\mu\text{L}$  of MACS buffer. Add the cell suspension into the column. Collect the flow-through containing unlabeled cells for a next magnetic cell sorting.  
**OPTIONAL:** LS column can be used if higher amount of cell sorting is required.
- 6) Wash column with 3x 500  $\mu\text{L}$  of MACS buffer. Move the column out from the magnetic separator. Add 1 mL MACS buffer into the column. Firmly flush out the buffer from the column by the plugger. Collect the labelled retained cells by a 15-mL Falcon tube. Centrifuge the cell suspension at  $4^\circ\text{C}$ , 400 g for 10 min.
- 7) Resuspend the cell pellet in medium for counting and seeding.

#### 1.2.1.5. Mouse Peripheral Blood Mononuclear Cell (circulating immune cells, or CIC) isolation

**NOTE:** This section refers to blood collected from the vena cava during the liver perfusion. If needed, more blood may be collected from the heart using a 1 mL syringe containing 0.5 mL EGTA buffer before or during the liver perfusion.

- 1) Centrifuge blood samples at  $4^\circ\text{C}$ , 400 g for 10 min.
- 2) Aspirate supernatant and resuspend cell pellets with 1 mL 1X red blood cell lysing buffer.
- 3) Incubate cell suspension on ice for 15 min.
- 4) Centrifuge at  $4^\circ\text{C}$ , 400 g for 10 min.
- 5) Aspirate supernatant and resuspend the cell pellet in cell culture medium for counting and seeding.

#### 1.2.2. LoC model assembly and disease modeling (see the biochip structure in Fig. 2B)

- 1) Sterilize the surface and inner cavities of biochip by pipetting in 70% ethanol and incubating for 40 min.
- 2) Wash cavities 3 times with DPBS buffer.
- 3) Pipet 500  $\mu\text{L}$  collagen coating buffer in each cavity and incubate for 15 min.
- 4) Wash cavities 3 times by DPBS buffer. Fill 500  $\mu\text{L}$  medium in each cavity. Block connections between cavities by plugs.
- 5) Cell seeding and intervention strategies:
  - a) On Day 1, seed 300,000 LSECs and 100,000 liver macrophages in the lower cavity. Close lids and flip down the chip. Incubate overnight at  $37^\circ\text{C}$ , 5%  $\text{CO}_2$ .
  - b) On Day 2, flip back the chip. Seed 300,000 hepatocytes and 100,000 HSCs in the upper cavity. Close lids. Incubate at  $37^\circ\text{C}$ , 5%  $\text{CO}_2$  for overnight.
  - c) On Day 3, add FFA treatment (300  $\mu\text{M}$ , PA:OA = 1:1), FFA + 20  $\mu\text{M}$  lanifibranor, 25 mM APAP or vehicle (0.1 mM BSA for FFAs or 1% PBS for APAP). Incubate at  $37^\circ\text{C}$ , 5%  $\text{CO}_2$  overnight.
- 6) Bio-chip perfusion strategies:
  - a) Connect the tubing to each lower cavity. Add 1 mL medium containing 100,000 CICs into each reservoir. Include FFA treatment as described above (300  $\mu\text{M}$ , PA:OA = 1:1), FFA + 20  $\mu\text{M}$  lanifibranor, 25 mM APAP or vehicle (0.1 mM BSA for FFAs or 1% PBS for APAP) in each reservoir.
  - b) Start perfusion in separated pumping channels at 50  $\mu\text{L} / \text{min}$ .
  - c) Transfer chip-pump assemblies into the incubator. Incubate at  $37^\circ\text{C}$ , 5%  $\text{CO}_2$  for 30 min – 48 hours depending on the experimental needs.

**CAUTION:** Bubbles should be avoided at all time during cell seeding into the biochip, medium changing and CIC perfusion.

- 7) Sampling strategies:
  - a) Apply live cell dye on cells and observe under microscope.
  - b) Harvest the perfusion medium and centrifuge at 4°C, 400g for 10 min. Collect CICs in the cell pellets. Keep the supernatant for further analyses (e.g. transaminases, cytokine levels, see corresponding sections).
  - c) Cut off membranes to harvest resident cells for cell visualization or RNA extraction.

### 1.2.3. Fluorescence detection

- 1) Live cell staining and detection
 

Hoechst 33342 is used to stain cell nucleus; the CellMask plasma membrane stain kit is used to indicate cell membrane and trace cells; the Apoptosis/ Necrosis Assay Kit is used to determine apoptotic, necrotic and viable cells; the BODIPY 505/515 is used to label intracellular lipid droplets. Experiments were all performed following manufacturers' manuals.
- 2) Immunocytochemistry (ICC)
  - a) Fix the cells (in the chip or on the collected membranes) with 4% PFA buffer at room temperature for 15 min.
 

**OPTIONAL:** Cells labelled by live cell dyes can be processed to ICC approaches after fixation. Permeabilize cells and block unspecific membrane antigens by the blocking buffer at the room temperature for 30 – 60 min.
  - b) Freshly dilute primary antibodies into the antibody buffer following manufacturers' manuals. Apply antibody solutions on cells and incubate at 4°C overnight or at room temperature for 4 h.
  - c) Wash cells twice with DPBS.
  - d) Freshly dilute secondary antibodies into the antibody buffer following manufacturers' instructions. Apply antibody solutions on cells and incubate at room temperature for 30 min.
  - e) Wash cells twice with DPBS.
  - f) Dissolve DAPI into DPBS to 0.1 µg/mL. Apply DAPI solution on cells and incubate at room temperature for 10 min.
  - g) Wash cells twice by DPBS.
  - h) Observe cells under the fluorescence microscope.

**OPTIONAL:** If necessary, mount cells by the VectaMount AQ aqueous mounting medium and cover cells with glass slides. Immersed into DPBS, glass slides can be gently detached in 30 min. Therefore, cells or membranes can be recycled for IF staining or other perspectives.

### 1.2.4. Human cell materials and human liver-on-a-chip methods

#### 1.2.4.1. Cell culture:

Human umbilical vein endothelial cells (HUVECs) were isolated from human umbilical cord veins  $3 \times 10^5/\text{cm}^2$  HUVEC cells in endothelial cell growth medium MV (Promocell, C-22020) supplemented with 1% penicillin-streptomycin (Invitrogen, 15140-122). Donors were informed about the aim of the study and gave written consent. HUVECs were used until passage three.

Monocytes were isolated from human blood. Briefly, peripheral blood mononuclear cells (PBMCs) were isolated by Ficoll density gradient centrifugation and seeded at a density of 1



$\times 10^6$  /cm<sup>2</sup> cell in x-vivo 15 (Lonza, 02-060F) supplemented with 10 ng/mL GM-CSF (PeproTech, 300-30-100UG), 10 ng/mL M-CSF (PeproTech, 300-25-100UG), and 1% penicillin-streptomycin (Invitrogen, 15140-122). After two hours of incubation at 5% CO<sub>2</sub> and 37 °C, the cells were washed twice with X-VIVO 15 medium (Lonza, 02-060F).

Adherent monocytes were then cultivated for in X-VIVO 15 supplemented with 10ng/mL GM-CSF (PeproTech, 300-30-100UG), 10 ng/mL M-CSF (PeproTech, 300-25-100UG), and 1% penicillin-streptomycin (Invitrogen, 15140-122).

HepaRG cells were obtained from Biopredic International (Rennes, France). Cells were seeded at a density of  $2.7 \times 10^4$  cells/cm<sup>2</sup> cells and cultured in William's E media (1x) [2,2g/L NaHCO<sub>3</sub>] (Gibco, 22551-022) supplemented with fetal bovine serum (FBS) (Gibco, 10270-106), 5 mg/mL insulin (Sigma Aldrich, 11061-68-0), 50 μM hydrocortisone-hemisuccinate (Merck, H2270-100mg), 2% DMSO (Sigma, D2650-100ml), and 100 U/mL penicillin / 100 mg/mL streptomycin mixture (Pen/Strep) (Invitrogen, 15140-122).

Human hepatic stellate cell line (LX-2) is generously given by Ralf Weiskirchen (Institute of Molecular Pathobiochemistry, University Hospital Aachen) and were cultivated  $3 \times 10^5$ /cm<sup>2</sup> LX-2 cells in DMEM with high glucose containing GlutaMAX™ supplement and pyruvate (Gibco, 31966-02) media supplemented with 10% FBS (Gibco, 10270-106), and 1% penicillin-streptomycin (Invitrogen, 15140-122). The cells were cultured in a humidified cell incubator at 5% CO<sub>2</sub> and 37 °C.

#### 1.2.4.2. Human Liver-on-chip (hLoC)

$3 \times 10^5$  HUVECs cells were seeded with  $1 \times 10^5$  macrophages at the same day in endothelial cell growth medium MV (Promocell, C-22020) supplemented with 1% penicillin-streptomycin (Invitrogen, 15140-122), 10ng/mL GM-CSF (PeproTech, 300-30-100UG), 10 ng/mL M-CSF (PeproTech, 300-25-100UG) at the lower cavity. The chip was flipped down and incubated overnight in a cell culture incubator with 5% CO<sub>2</sub> at 37 °C.

At the following day,  $2 \times 10^5$  HepaRG and  $1 \times 10^5$  LX-2 cells were mixed in William's E media (1x) [2,2g/L NaHCO<sub>3</sub>] (Gibco, 22551-022) supplemented with FBS (Gibco, 10270-106), 5 mg/mL insulin (Sigma Aldrich, 11061-68-0), 50 μM hydrocortisone-hemisuccinate (Merck, H2270-100mg), 2% DMSO (Sigma, D2650-100ml), and 100 U/mL penicillin / 100 mg/mL streptomycin mixture (Pen/Strep) (Invitrogen, 15140-122). Cells were seeded on the opposite side of the chip membrane and cultured in a cell culture incubator with 5% CO<sub>2</sub> at 37 °C for 24 hours.

At the third day, treatments with free fatty acids (FFA) [300 μM, mixture of palmitic acid (PA) (Sigma-Aldrich, P0500) and oleic acid (OA), v/v = 1:1] (Sigma-Aldrich, O1008), FFA mixture supplemented with 20μM lanifibrinor (Biozol, 927961-18-0) and 10% BSA (Sigma-Aldrich, A9430) was performed by perfusion of the hLoC.

#### 1.2.4.3. Biochip perfusion

hLoC was perfused on both sides for 24 hours with a flow rate of 50 μL / min using a peristaltic pump (Cole-Parmer™, Ismatec™ Reglo ICC Digital). 1 mL medium containing 100,000 CICs (total PBMCs) was circulated at the lower cavity containing HUVEC / macrophages. Medium containing FFAs, FFAs + 20 μM lanifibrinor, and 10% BSA was added to the medium perfusing both sides of the membrane. After perfusing chips with CICs for 30 minutes, flow cytometry analysis of the flow through medium containing nonadherent CICs was performed. Lipid accumulation was measured at 24h after starting FFA treatment.

#### 1.2.4.4. Staining of CICs and flow cytometry

Cells were collected from perfusate by centrifugation and stained for viability using Zombie UV™ Fixable Viability Kit (BioLegend, 423107) for 10 minutes at 4°C. Cells were

subsequently stained with antibodies provided in Table S1, fixed with 4% PFA in PBS for 10 minutes at 4°C and cells analyzed using a BD LSR Fortessa flow cytometer (Becton Dickinson).

#### **1.2.4.5. BODIPY 505/515 lipid staining and Hoechst DNA staining:**

BODIPY solution (Thermo Fisher, D3921) and Hoechst (Sigma Aldrich, H3342) were diluted in PBS 1:1000 and incubated with live cells in the dark for 15 min at 37 °C. After washing twice with PBS, cells were analyzed by immunofluorescence microscopy using an AxioObserver Z1 microscope equipped with Apotome2 (Carl Zeiss AG, Jena, Germany)

#### **1.2.4.6. Cytokine measurement**

Cytokine concentrations were measured using multiplex bead-based immunoassays (LEGENDplex, BioLegend, 740808) on a flow cytometer BD LSR Fortessa (Becton Dickinson). Data analysis was performed using manufacturers data analysis software (BioLegend, SanDiego, CA, USA).

#### **1.2.4.7. Ethics**

The study with hLoC and the isolation and use of PBMCs and HUVECs was approved by the ethics committee of the Jena University Hospital (2020–1684, 3939–12/13). All donors were informed about the aim of the study and gave written consent.

### **1.2.5. Analysis of APAP metabolism by HPLC coupled to high-resolution mass spectrometry (HRMS)**

LoC perfusates and 2D cell culture supernatants were centrifuged at 10,000 g for 10 min and then subjected to HPLC-HRMS analysis. Chromatographic separation was achieved on a 1290 Infinity II HPLC (Agilent Technologies) equipped with a Zorbax Eclipse Plus C18 column (2.1 x 50 mm, 1.8 µm; Agilent Technologies). A mobile phase system consisting of water and acetonitrile, both acidified with 0.1% formic acid, was used for gradient elution at a flow rate of 0.35 mL/min. The HPLC eluate was directed to an electrospray ionization interface operated in positive mode (ESI+). Ions were analyzed using a 6550 iFunnel quadrupole time-of-flight (QTOF) mass spectrometer (Agilent Technologies). QTOF analysis was performed in scan mode in the range of  $m/z$  50 to 1,700 with a scan rate of 3 spectra/s. The reference masses  $m/z$  121.0509 and  $m/z$  922.0098 were continuously supplied by an isocratic pump. The identity of the APAP metabolites was confirmed by the mass error ( $\Delta m/z$ ) of less than 3 ppm and the isotopic pattern, both determined using MassHunter Qualitative Analysis software (version 10.0, Agilent Technologies).

### **1.2.6. Sphingolipid quantification in liver-on-a-chip perfusates by HPLC-ESI-MS/MS**

Perfusates (300 µL) were subjected to lipid extraction using 1.5 mL methanol/chloroform (2:1, v:v) containing the internal standards  $d_7$ -dihydrosphingosine ( $d_7$ -dhSph),  $d_7$ -sphingosine ( $d_7$ -Sph),  $d_7$ -sphingosine 1-phosphate ( $d_7$ -S1P), 17:0 ceramide ( $d_{18}:1/17:0$ ; 17:0 Cer),  $d_{31}$ -16:0 sphingomyelin ( $d_{18}:1/16:0$ - $d_{31}$ ; 16:0- $d_{31}$  SM), 17:0 glucosyl( $\beta$ ) ceramide ( $d_{18}:1/17:0$ ; 17:0 HexCer) and 17:0 lactosyl( $\beta$ ) ceramide ( $d_{18}:1/17:0$ ; 17:0 LacCer) (all Avanti Polar Lipids, Alabaster, AL, USA). Extraction was facilitated by incubation at 48°C with gentle shaking (120 rpm) overnight. To reduce interference from glycerolipids, samples were saponified with 150 µL 1 M methanolic KOH for 2 h at 37°C with gentle shaking (120 rpm) followed by neutralization with 12 µL glacial acetic acid. After centrifugation at 2,200 g for 10 min at 4°C, organic supernatants were evaporated to dryness using a Savant SpeedVac concentrator (Thermo Fisher Scientific, Dreieich, Germany). Dried residues were reconstituted in 200 µL acetonitrile/methanol/water (47.5:47.5:5 (v:v:v), 0.1% formic acid) and subjected to HPLC-

ESI-MS/MS sphingolipid quantification applying the multiple reaction monitoring (MRM) approach. Chromatographic separation was achieved on a 1290 Infinity II HPLC (Agilent Technologies, Waldbronn, Germany) equipped with a Poroshell 120 EC-C8 column (3.0 x 150 mm, 2.7  $\mu\text{m}$ ; Agilent Technologies) guarded by a pre-column (3.0 x 5 mm, 2.7  $\mu\text{m}$ ) of identical material. The column compartment was maintained at 30°C and the injection volume was 10  $\mu\text{L}$ . A mobile phase system consisting of water (solvent A) and acetonitrile/methanol (1:1, v:v; solvent B), both acidified with 0.1% formic acid, was used for gradient elution at an initial composition of 40:60 (A:B, v:v) and a flow rate of 0.5 mL/min. MS/MS analyses were carried out using a 6495C triple-quadrupole mass spectrometer (Agilent Technologies) operating in the positive electrospray ionization mode (ESI+) [3]. The following ion source parameters were set: sheath gas temperature, 375°C; sheath gas flow, 12 L/min of nitrogen; nebulizer pressure, 20 psi; drying gas temperature, 240°C; drying gas flow, 20 L/min of nitrogen; capillary voltage, 4000 V; nozzle voltage, 2000 V; iFunnel high pressure RF voltage, 90 V and iFunnel low pressure RF voltage, 60 V.

The following mass transitions were recorded (qualifier product ions in parentheses):

long-chain bases (LCB):  $m/z$  300.3  $\rightarrow$  282.3 (252.3) for Sph,  $m/z$  302.3  $\rightarrow$  284.3 (254.3) for dhSph,  $m/z$  307.3  $\rightarrow$  289.3 (259.3) for  $d_7$ -Sph,  $m/z$  309.4  $\rightarrow$  291.3 (261.3) for  $d_7$ -dhSph,  $m/z$  380.3  $\rightarrow$  264.3 (82.1) for S1P, and  $m/z$  387.3  $\rightarrow$  271.3 (82.1) for  $d_7$ -S1P; ceramides (Cer):  $m/z$  520.5  $\rightarrow$  264.3 (282.3) for 16:0 Cer,  $m/z$  534.5  $\rightarrow$  264.3 (282.3) for 17:0 Cer,  $m/z$  548.5  $\rightarrow$  264.3 (282.3) for 18:0 Cer,  $m/z$  576.6  $\rightarrow$  264.3 (282.3) for 20:0 Cer,  $m/z$  604.6  $\rightarrow$  264.3 (282.3) for 22:0 Cer,  $m/z$  630.6  $\rightarrow$  264.3 (282.3) for 24:1 Cer, and  $m/z$  632.6  $\rightarrow$  264.3 (282.3) for 24:0 Cer; dihydroceramides (dhCer):  $m/z$  540.5  $\rightarrow$  522.6 (284.3) for 16:0 dhCer,  $m/z$  568.5  $\rightarrow$  550.5 (284.3) for 18:0 dhCer,  $m/z$  596.6  $\rightarrow$  578.6 (284.3) for 20:0 dhCer,  $m/z$  624.6  $\rightarrow$  606.6 (284.3) for 22:0 dhCer,  $m/z$  650.7  $\rightarrow$  632.7 (284.3) for 24:1 dhCer, and  $m/z$  652.7  $\rightarrow$  634.6 (284.3) for 24:0 dhCer; sphingomyelins (SM):  $m/z$  703.6  $\rightarrow$  184.1 (86.1) for 16:0 SM,  $m/z$  731.6  $\rightarrow$  184.1 (86.1) for 18:0 SM,  $m/z$  734.6  $\rightarrow$  184.1 (86.1) for 16:0- $d_{31}$  SM,  $m/z$  759.6  $\rightarrow$  184.1 (86.1) for 20:0 SM,  $m/z$  787.7  $\rightarrow$  184.1 (86.1) for 22:0 SM,  $m/z$  813.7  $\rightarrow$  184.1 (86.1) for 24:1 SM, and  $m/z$  815.7  $\rightarrow$  184.1 (86.1) for 24:0 SM; hexosylceramides (HexCer):  $m/z$  700.6  $\rightarrow$  264.2 (682.6, 520.6) for 16:0 HexCer,  $m/z$  714.6  $\rightarrow$  264.2 (696.6, 534.6) for 17:0 HexCer, and  $m/z$  810.7  $\rightarrow$  264.2 (792.7, 630.6) for 24:1 HexCer; lactosylceramides (LacCer):  $m/z$  862.6  $\rightarrow$  264.3 (844.6, 520.5) for 16:0 LacCer,  $m/z$  876.6  $\rightarrow$  264.3 (858.6, 534.5) for 17:0 LacCer, and  $m/z$  972.7  $\rightarrow$  264.2 (954.8, 630.7) for 24:1 LacCer.

Peak areas of Cer, dhCer, SM, HexCer and LacCer sub-species, as determined with MassHunter software (Agilent Technologies), were normalized to those of their internal standards (17:0 Cer for Cer and dhCer sub-species; 16:0- $d_{31}$  SM for SM sub-species; 17:0 HexCer for HexCer sub-species and 17:0 LacCer for LacCer sub-species) followed by external calibration in the range of 1 fmol or 10 fmol (HexCer, LacCer) to 5 pmol (dhCer), 15 pmol (HexCer, LacCer) or 50 pmol (Cer, SM) on column. DhSph, Sph and S1P were directly quantified via their deuterated internal standards  $d_7$ -dhSph (0.125 pmol on column),  $d_7$ -Sph (0.25 pmol on column) and  $d_7$ -S1P (0.125 pmol on column). Quantification was performed with MassHunter Quantitative Analysis software (version 10.1, Agilent Technologies).

## 2. Supplementary references

1. Raasch, M. et al. Microfluidically supported biochip design for culture of endothelial cell layers with improved perfusion conditions. *Biofabrication* 7, 015013 (2015).

<https://doi.org/10.1088/1758-5090/7/1/015013>

2. Siwczak, F. et al. Human macrophage polarization determines bacterial persistence of *Staphylococcus aureus* in a liver-on-chip-based infection model. *Biomaterials* 287, 121632 (2022). <https://doi.org/10.1016/j.biomaterials.2022.121632>
3. Naser, E. et al. Characterization of the small molecule ARC39, a direct and specific inhibitor of acid sphingomyelinase in vitro. *J Lipid Res* 61, 896-910 (2020). <https://doi.org/10.1194/jlr.RA120000682>

## **2. Supplementary figures and legends**

A

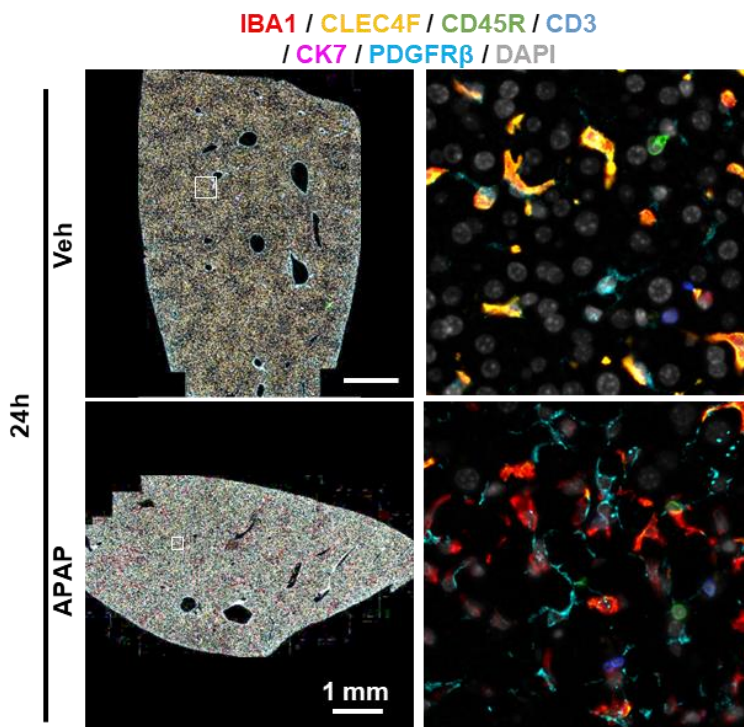

B

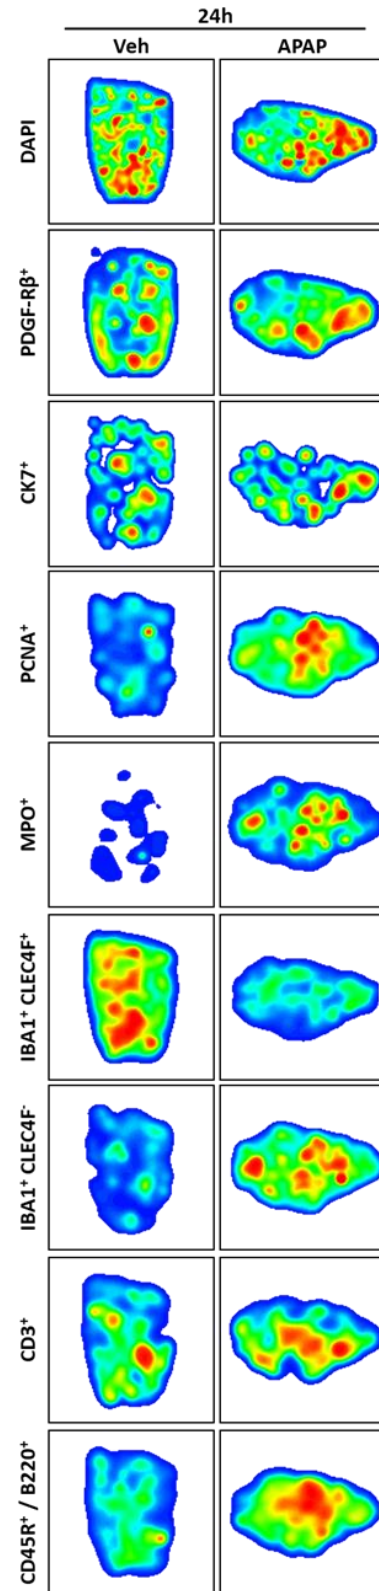

C

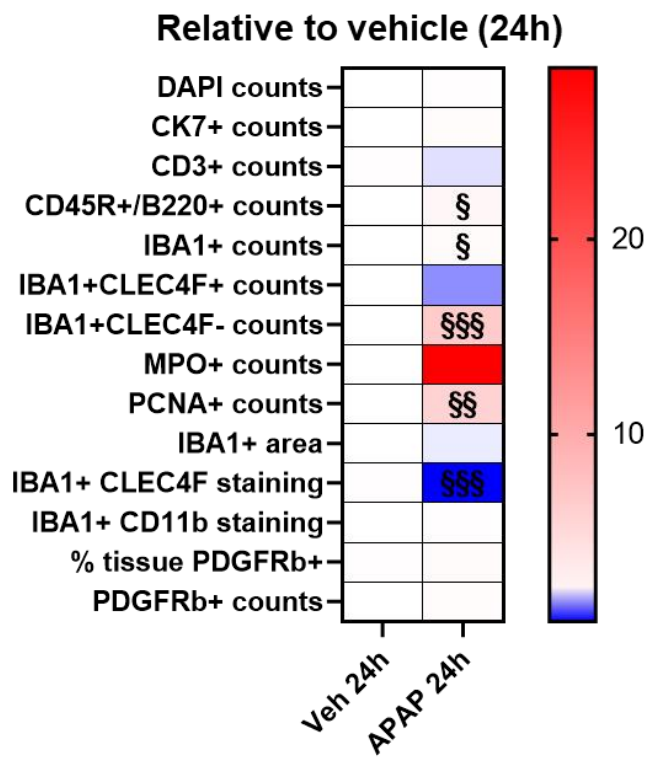

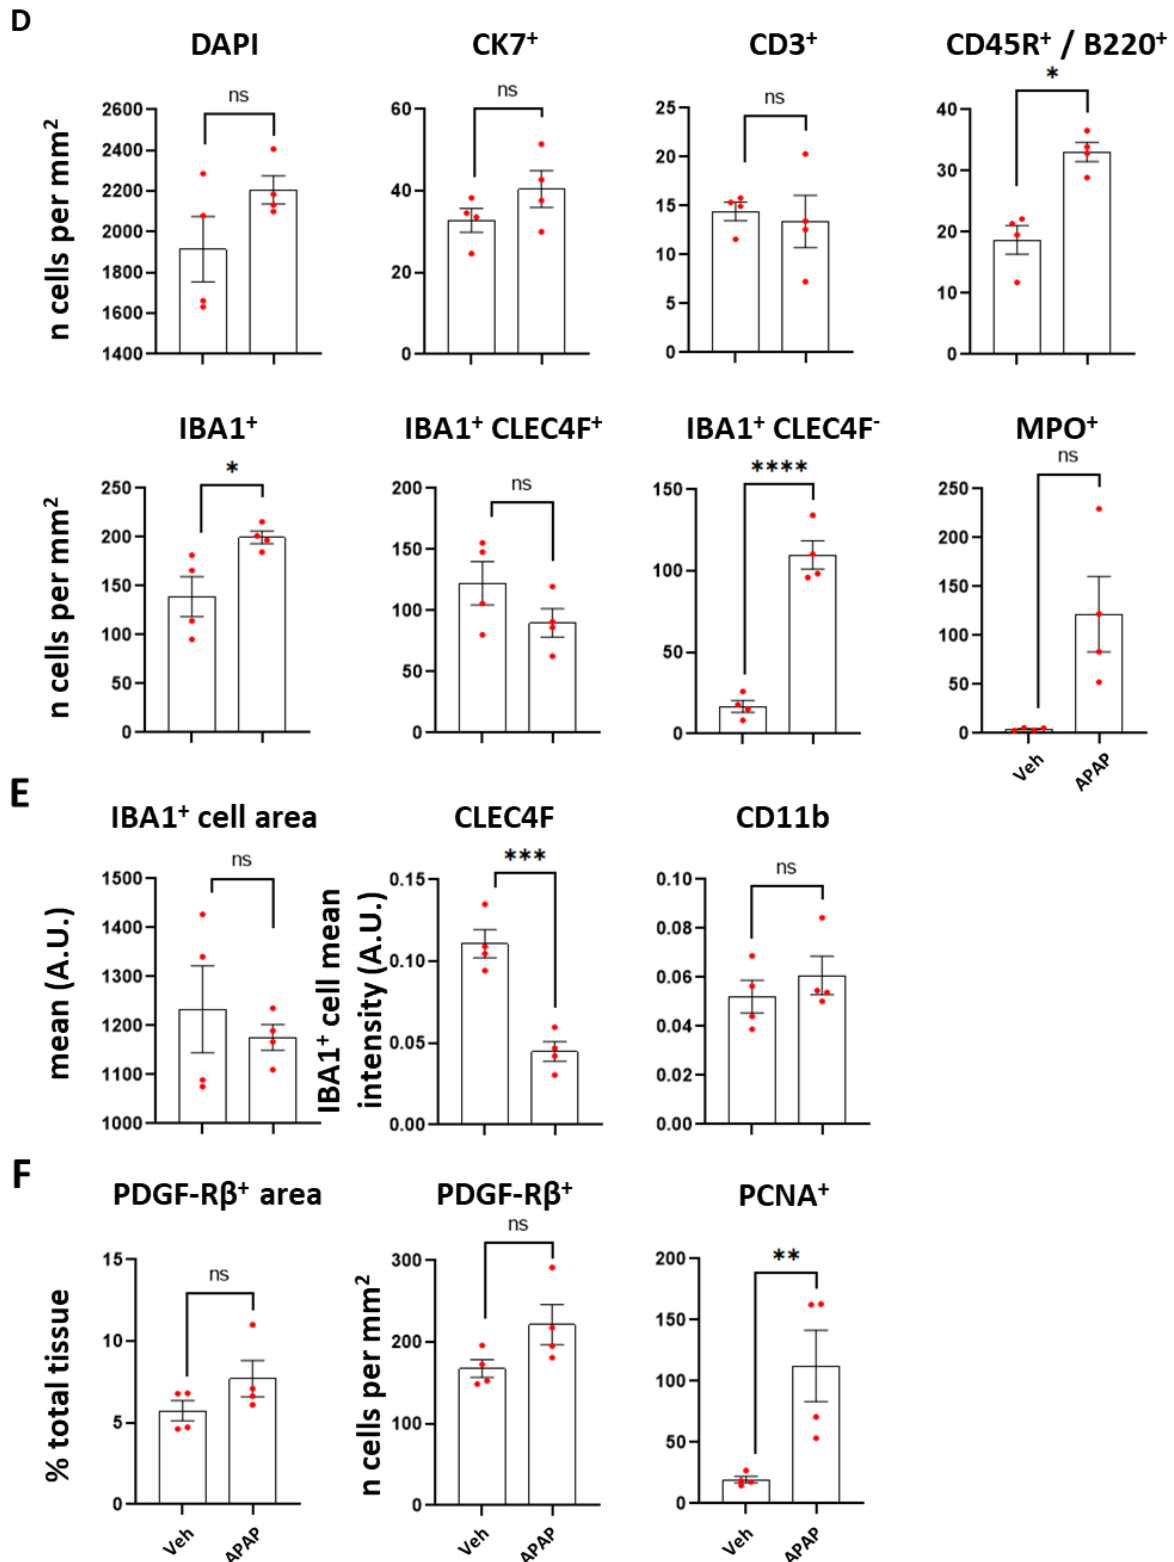

**Figure S1. Multiplex immunostaining used to characterize the changing immune landscape in the mouse acute acetaminophen-induced liver injury model.** Mice received a single APAP injection and tissues were collected 24 hours later. (A) Representative fields of view depicting liver tissue sections subjected to multiplex immunostaining. (B) Heat-maps representing cellular density distribution across the samples shown in panel (A). Cell counts and individual cell measurements were collected and are depicted as (C) a matrix or (D-F) in individual graphs. Sample sizes: n(Veh) = 4, n(APAP) = 4. Abbreviations: APAP:



acetaminophen; Veh: vehicle; CK7: cytokeratin 7; CD3: cluster of differentiation 3; CD45R: cluster of differentiation 45 receptor; IBA1: Ionized calcium binding adaptor molecule 1; CLEC4F: C-Type Lectin Domain Family 4 Member F; MPO: myeloperoxidase; PCNA: proliferating cell nuclear antigen; CD11b: cluster of differentiation 11b; PDGFRB: platelet-derived growth factor receptor beta. One-way ANOVA followed by Student's t tests was performed. \*p<0.05; \*\*p<0.01; \*\*\*p<0.005 as compared to vehicle 12h; §p<0.05; §§p<0.01; §§§p<0.005 as compared to vehicle 24h.

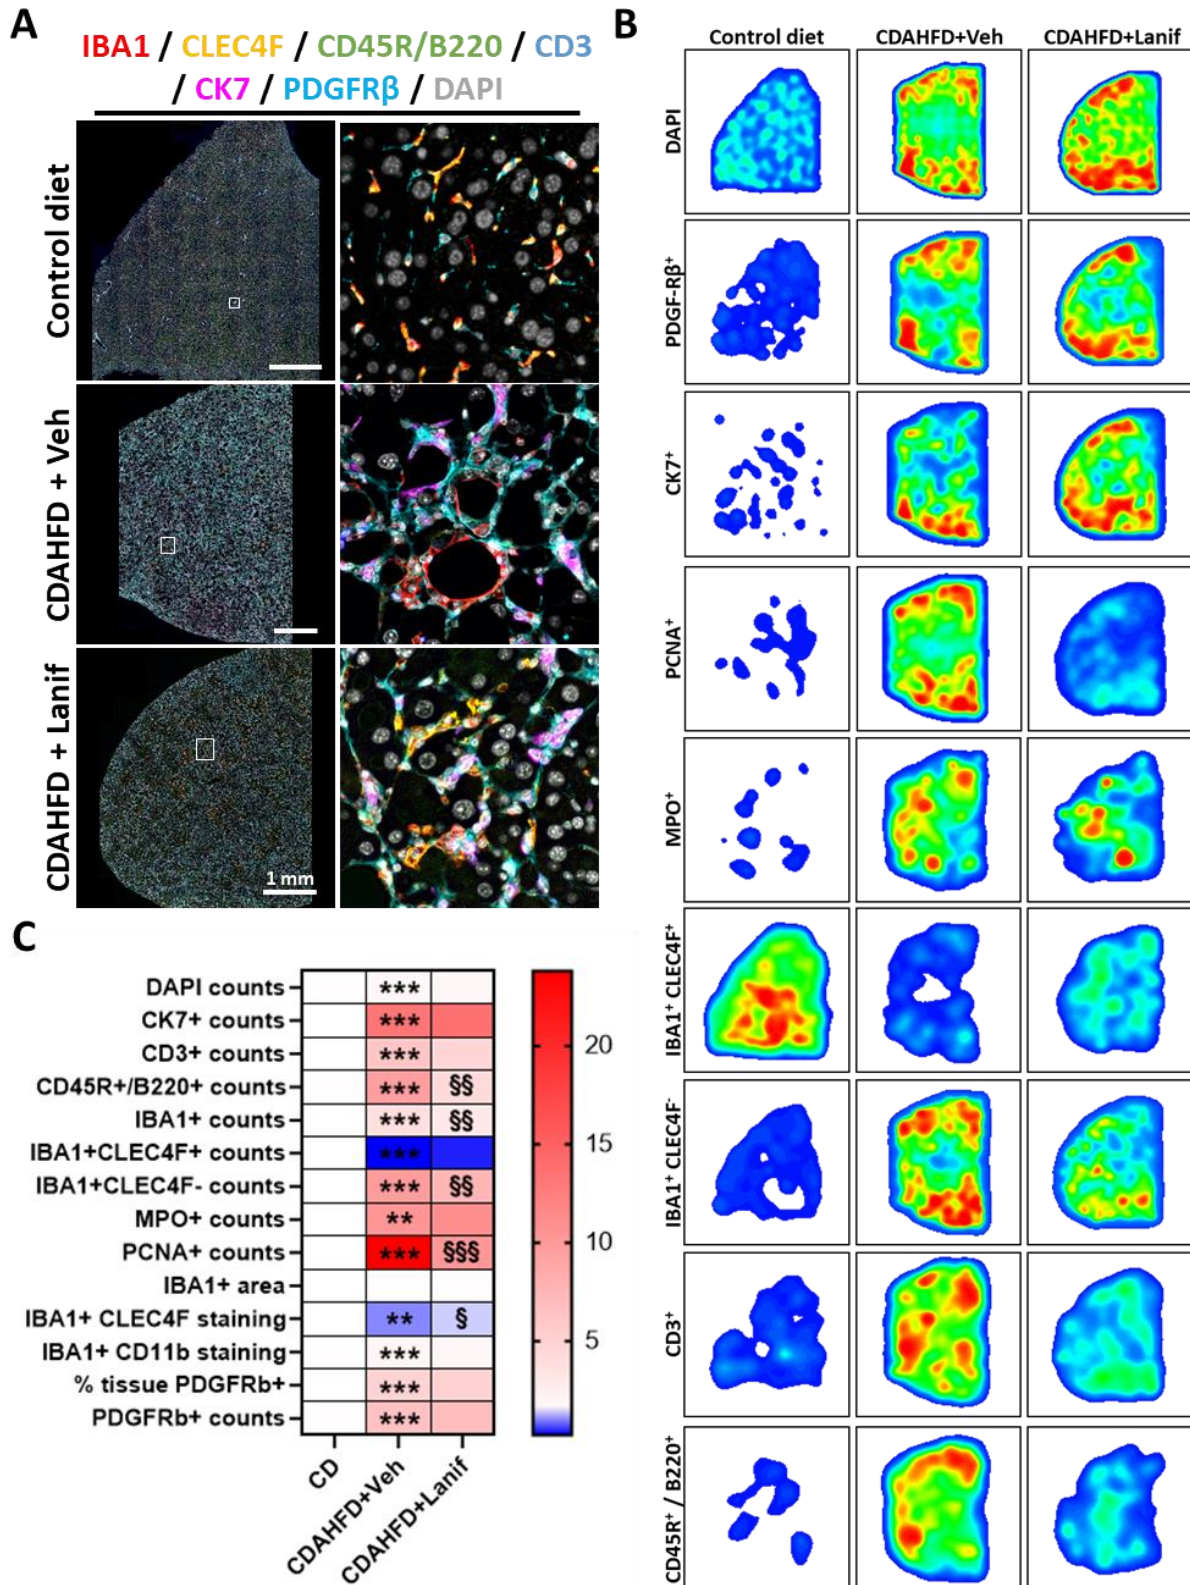

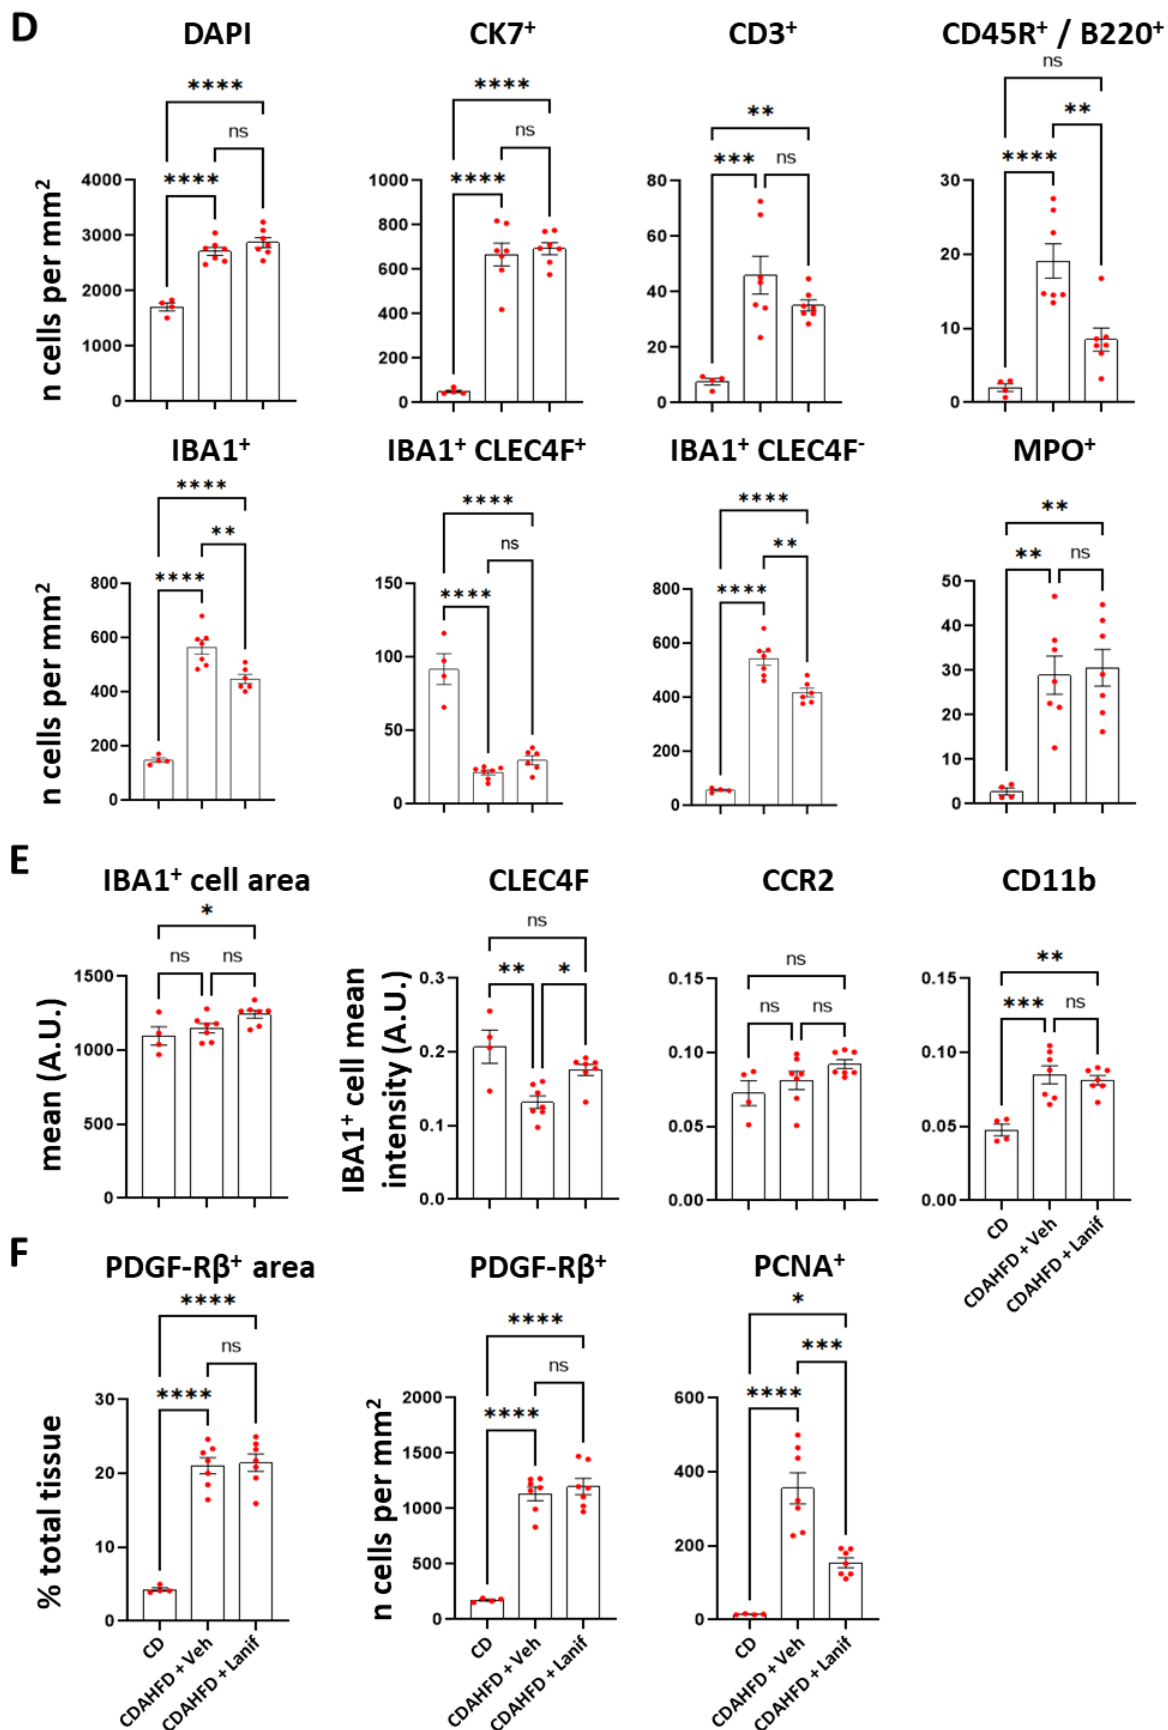

**Figure S2. Multiplex immunostaining used to characterize the changing immune landscape in the mouse CDAHFD steatosis model. Mice were fed a CDAHFD diet for 8**



weeks and received either vehicle or lanifibranor for the last 2 weeks. **(A)** Representative fields of view depicting liver tissue sections subjected to multiplex immunostaining. **(B)** Heat-maps representing cellular density distribution across the samples shown in panel (A). Cell counts and individual cell measurements were collected and are depicted as **(C)** a matrix or **(D-F)** in individual graphs. **(D)** Individual cell counts normalized to total tissue areas. **(E)** Single cell average size and mean immunostaining intensity for individual markers in IBA1-positive cells. **(F)** PDGF-Rbeta positive areas represented as percentage of total tissue, PDGF-Rbeta- and PCNA-positive cell counts normalized to total tissue areas. Sample sizes: n(control diet) = 4, n(CDAHFD + Veh) = 7, n(CDAHFD + Lanif) = 7. Abbreviations: CDAHFD: choline-deficient L-amino acid-defined, high-fat diet; CD3: cluster of differentiation 3; CD11b: cluster of differentiation 11b; CD45R: cluster of differentiation 45 receptor; IBA1: Ionized calcium binding adaptor molecule 1; CK7: cytokeratin 7; CLEC4F: C-Type Lectin Domain Family 4 Member F; Lanif: lanifibranor; MPO: myeloperoxidase; PCNA: proliferating cell nuclear antigen; PDGF-R $\beta$ : platelet-derived growth factor receptor beta; Veh: vehicle. One-way ANOVA followed by Tukey's multiple comparison was performed. \*\*p<0.01; \*\*\*p<0.005 as compared to control diet; §p<0.05; §§p<0.01; §§§p<0.005 as compared to CDAHFD+Veh.

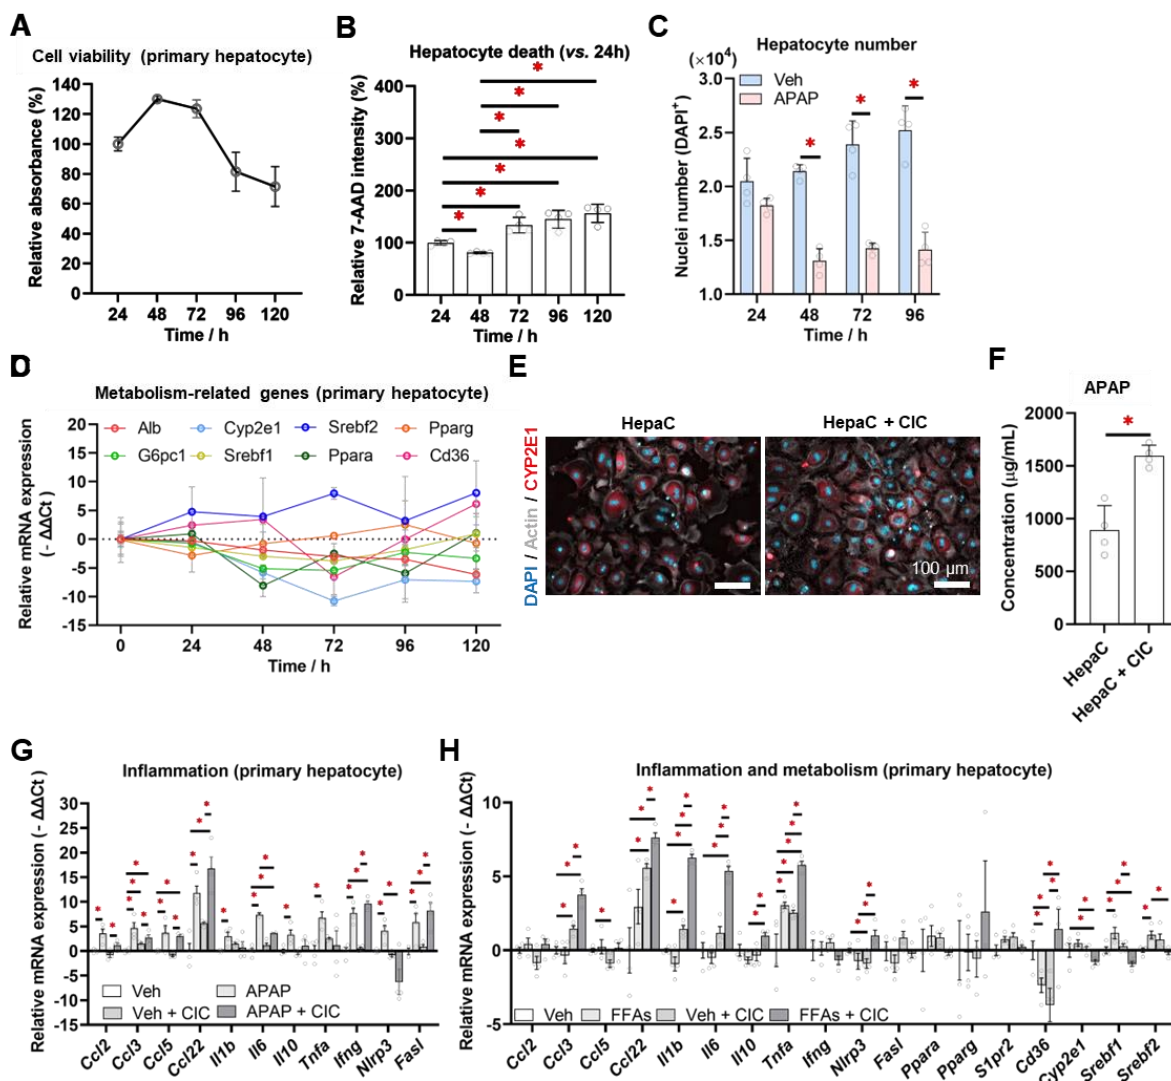

**Figure S3. *In vitro* investigations on primary hepatocyte culture with cultivation and gene expression alterations in the presence of CICs. (A)** Relative cell amount of in-vitro

cultivated mouse primary hepatocytes was measured at 0, 24, 48, 72, 96 and 120 h after isolation and seeding. **(B)** Relative cell death levels (7-AAD<sup>+</sup>) of in-vitro cultivated mouse primary hepatocytes was measured at 0, 24, 48, 72, 96 and 120 h. **(C)** Metabolism-related gene expressions were assessed. **(D)** 7AAD staining was performed upon APAP treatment. **(E)** CYP2E1 expression was measured on untreated hepatocytes and hepatocytes + CICs. **(F)** Remaining APAP concentration was measured in the culture of hepatocytes and hepatocytes + CICs under APAP treatment for 24 h. **(G, H)** Gene expression analysis of conventional culture systems combining CICs with hepatocytes for 24 h. Sample size: (B-H) n = 4 per group. Abbreviations: *Alb*: albumin; APAP: acetaminophen; *Ccl*: chemokine (C-C motif) ligand; CIC: circulating immune cells; *Cyp2e1*: cytochrome P450 family 2 subfamily E member 1; *Fasl*: FAS ligand; FFAs: free fatty acids; Lanif: lanifibranor; *G6pc1*: glucose-6-phosphatase catalytic subunit 1; *Il*: interleukin; *Ifn*: interferon; *Nlrp3*: NLR family pyrin domain containing 3; *Ppar*: peroxisome proliferator activated receptor; *Slpr2*: sphingosine-1-phosphate receptor 2; *Srebf*: sterol regulatory element-binding transcription factor; *Tnfa*: tumor necrosis factor-alpha; Veh: vehicle. One-way ANOVA and Tukey's multiple comparison were performed. \*p<0.05 as indicated.

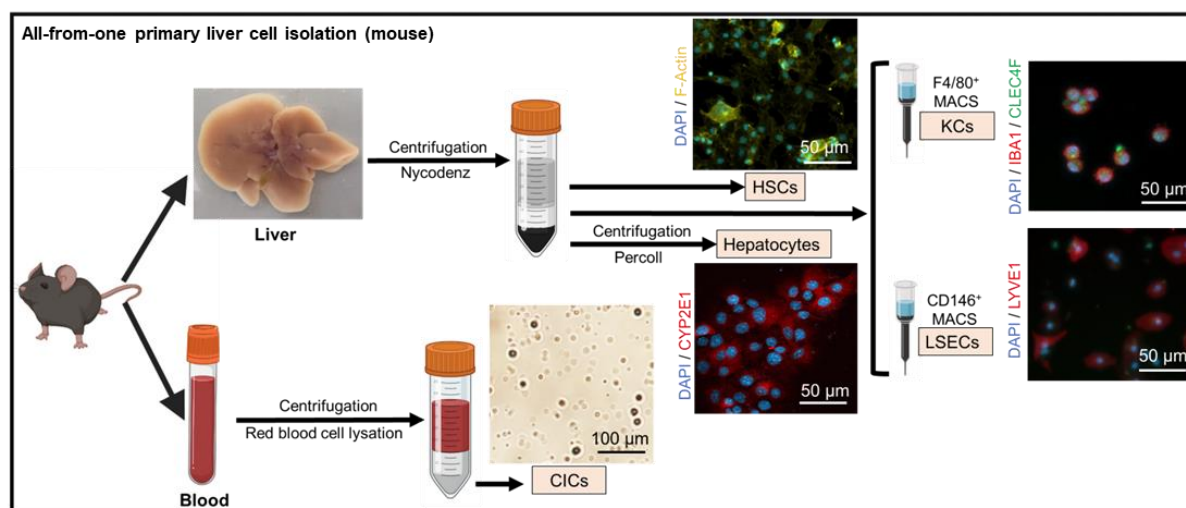

**Figure S4. All-from-one primary liver cell isolation (mouse) procedure and multicellular layout of LoC model.** (A) Primary hepatocytes, HSCs, KCs and LSECs are sequentially isolated from mouse liver using centrifugation or MACS methods. CICs are isolated from mouse blood using red blood lysis and centrifugation methods. Abbreviations: HSC: hepatic stellate cell; KC: Kupffer cell; LSEC: liver sinusoidal cell; CIC: circulating immune cell; MACS: Magnetic-activated cell sorting.

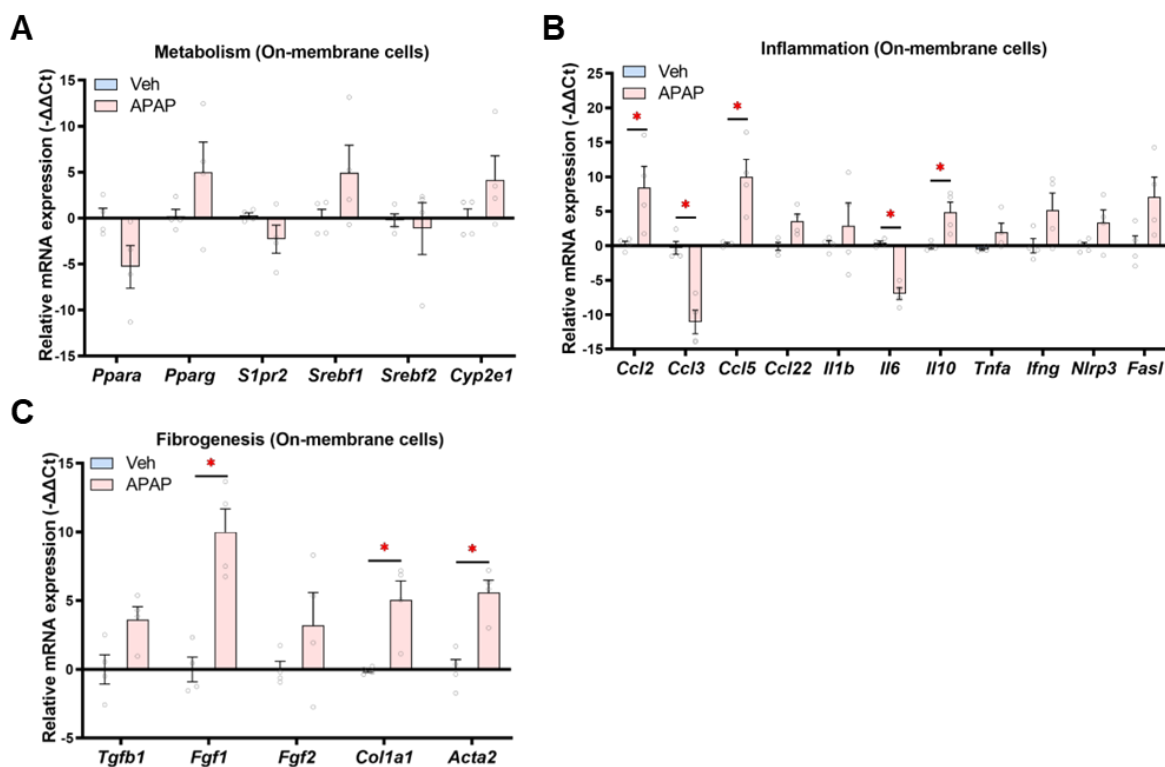

**Figure S5. Gene expression profile of on-membrane cells of LoC.** (A-C) Gene expression analysis of on-membrane cells of LoC upon APAP administration. Sample size:  $n = 4$  per group. Abbreviations: APAP: acetaminophen; Veh: vehicle; IL: interleukin; CCL: the chemokine (C-C motif) ligand; IFN: interferon; TNF- $\alpha$ : tumor necrosis factor- $\alpha$ ; NLRP3: NLR family pyrin domain containing 3; FASL: FAS ligand; PPAR: peroxisome proliferator activated receptor; S1PR2: sphingosine-1-phosphate receptor 2; CYP2E1: cytochrome P450 family 2 subfamily E member 1; SREBF: sterol regulatory element-binding transcription factor. Unpaired student's t-tests were performed. \* $p < 0.05$  as indicated.

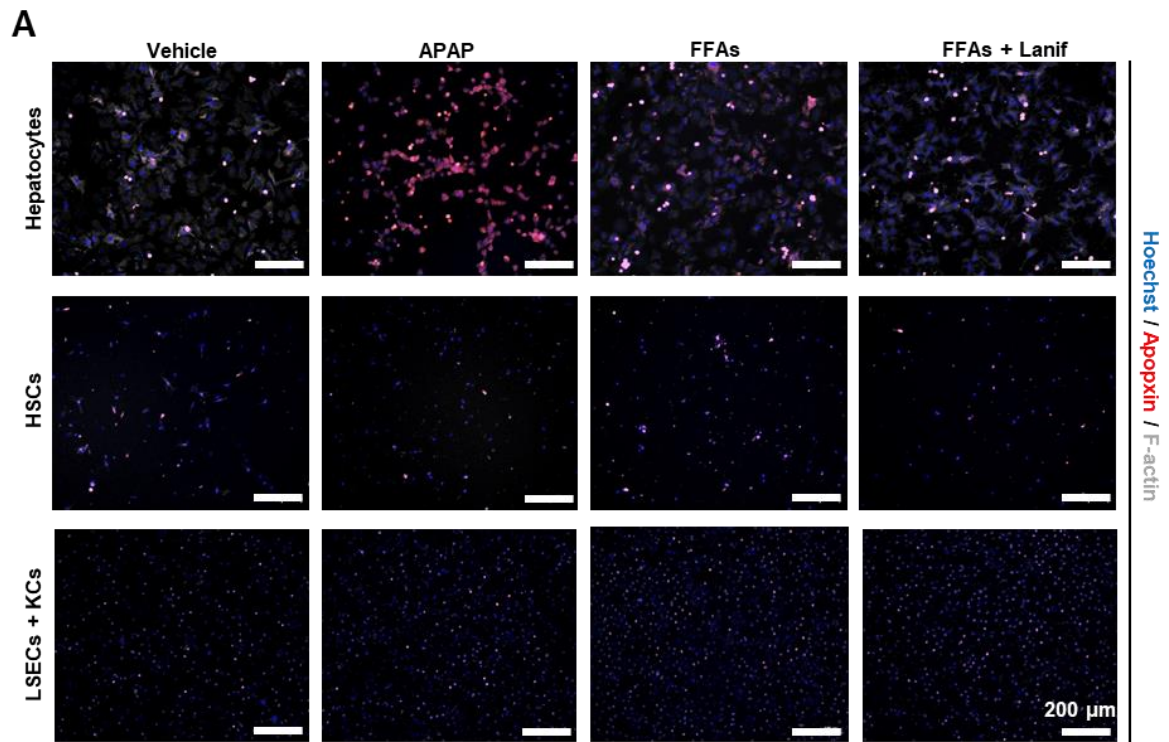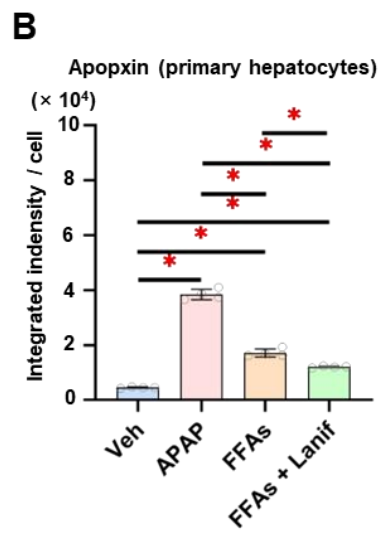



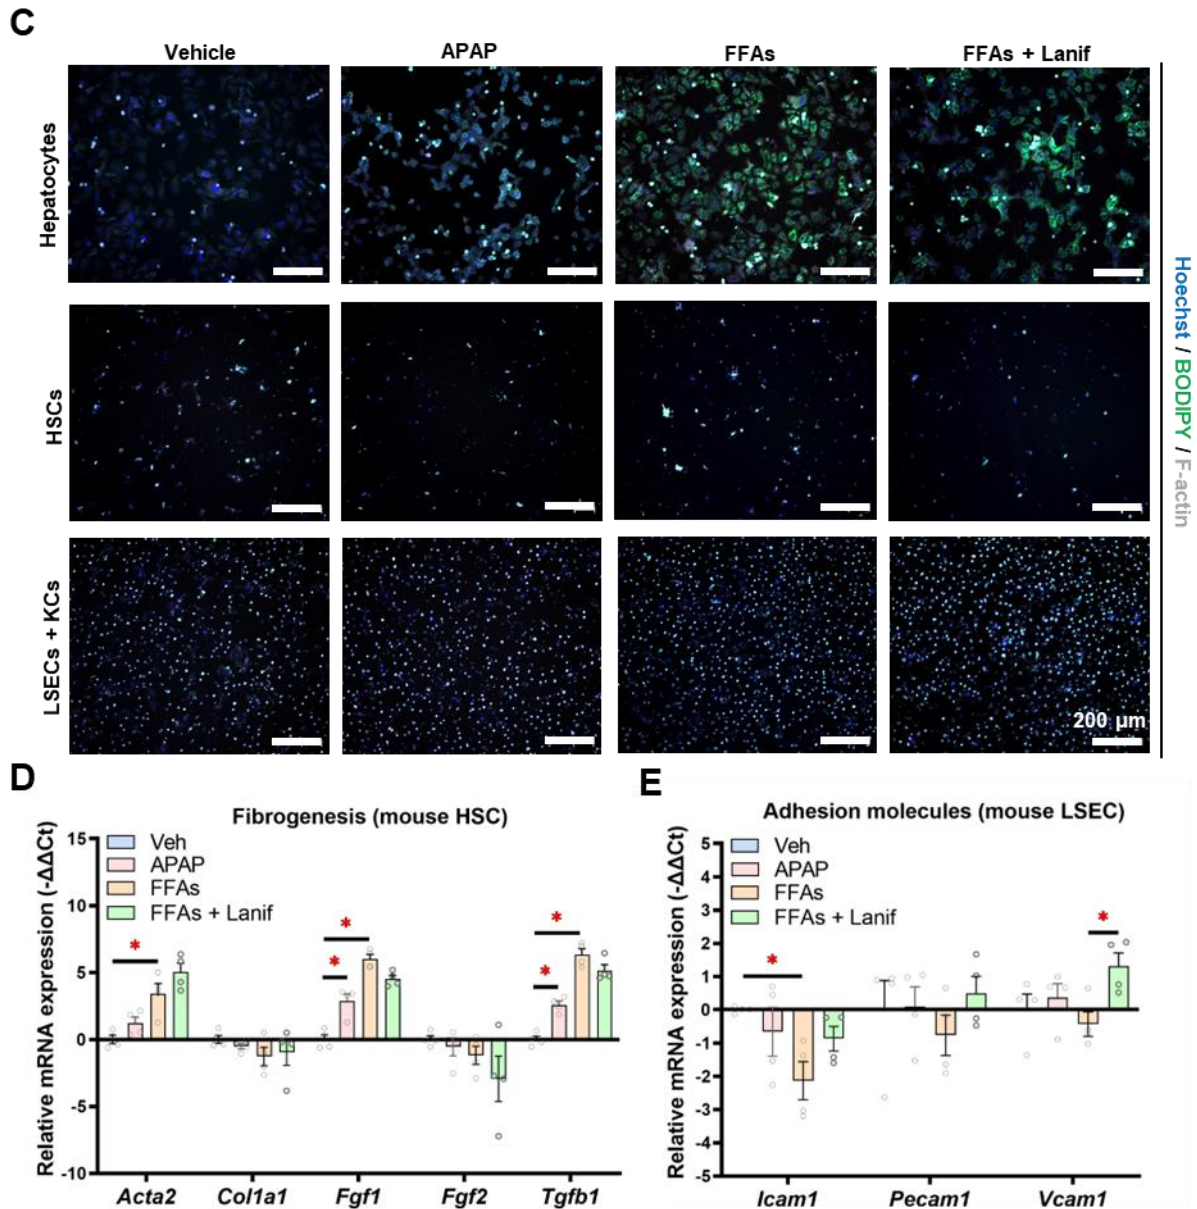

**Figure S6. Primary liver cell response to acetaminophen, FFAs and lanifibranor in conventional 2-dimensional culture.** Primary liver cells were seeded in conventional 2-dimensional culture and exposed to acetaminophen, FFAs and lanifibranor. (A) Cell death was evidenced by Apopxin. (B) Apopxin staining in hepatocytes was quantified. (C) lipid vesicle accumulation was evidenced by BODIPY. Gene expression was analyzed in (D) HSCs and (E) LSECs. Sample size:  $n = 4$  per group. Abbreviations: APAP: acetaminophen; FFAs: free fatty acids; HSC: hepatic stellate cell; KC: Kupffer cell; Lanif: lanifibranor; LSEC: liver sinusoidal endothelial cell; Veh: vehicle. Unpaired student's t-tests or one-way ANOVA and Tukey's multiple comparison were performed. \* $p < 0.05$  as indicated.

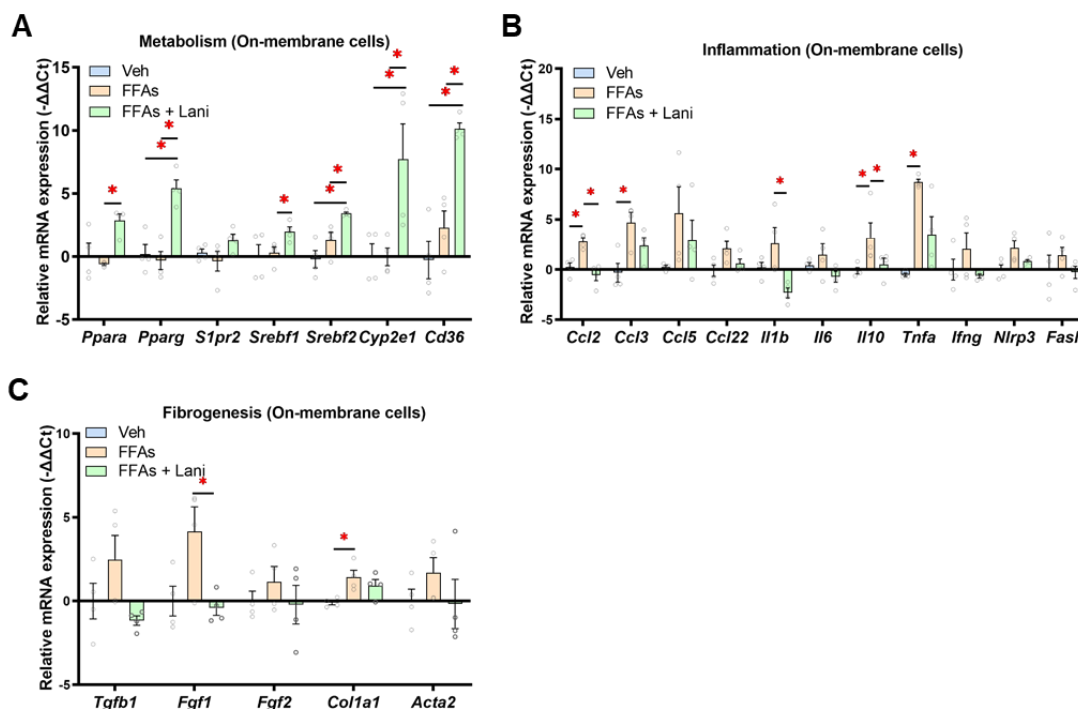

**Figure S7. Gene expression profile of on-membrane cells of LoC.** (A-C) Gene expression analysis of on-membrane cells of LoC upon FFAs and lanifibranor administration. Sample size:  $n = 4$  per group. Abbreviations: FFAs: free fatty acids; Lanif: lanifibranor; Veh: vehicle; IL: interleukin; CCL: the chemokine (C-C motif) ligand; IFN: interferon; TNF- $\alpha$ : tumor necrosis factor- $\alpha$ ; NLRP3: NLR family pyrin domain containing 3; FASL: FAS ligand; PPAR: peroxisome proliferator activated receptor; S1PR2: sphingosine-1-phosphate receptor 2; CYP2E1: cytochrome P450 family 2 subfamily E member 1; SREBF: sterol regulatory element-binding transcription factor Unpaired student's t-tests or one-way ANOVA and Tukey's multiple comparison were performed. \* $p < 0.05$  as indicated.

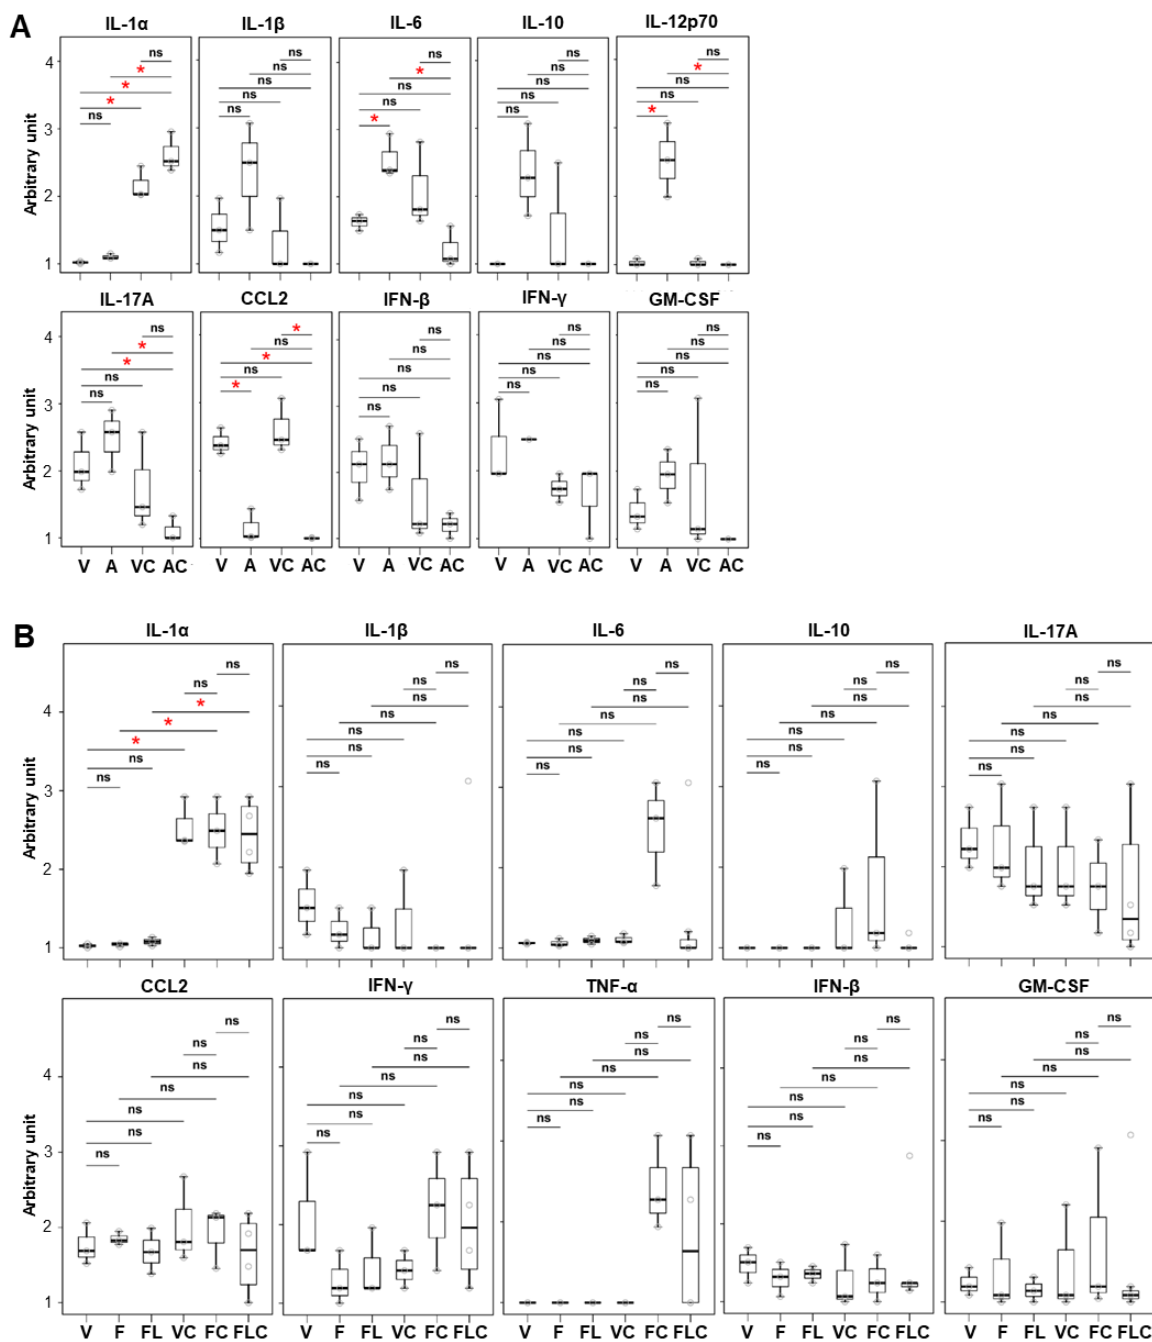

**Figure S8. The presence of CICs influences the *in vitro* cytokine milieu upon FFA treatment of primary hepatocytes.** Primary mouse hepatocytes were treated with APAP, FFA and lanifibranor in the presence or absence of CICs. Culture medium was collected and cytokine levels were measured. Cytokines levels were measured after (A) APAP, or (B) FFA and lanifibranor treatments. Data is depicted as arbitrary units due to the low range of the measurements. Sample size: n = 4 per group. Abbreviations: A: acetaminophen; C: circulating immune cells; F or FFAs: free fatty acids; HPLC-ESI-MS/MS: liquid chromatography-electrospray ionization tandem mass spectrometry; L or Lani: lanifibranor; MFI: mean fluorescence intensity; V or Veh: vehicle. One-way ANOVA and Tukey's multiple comparison were performed. \*p<0.05 as indicated.

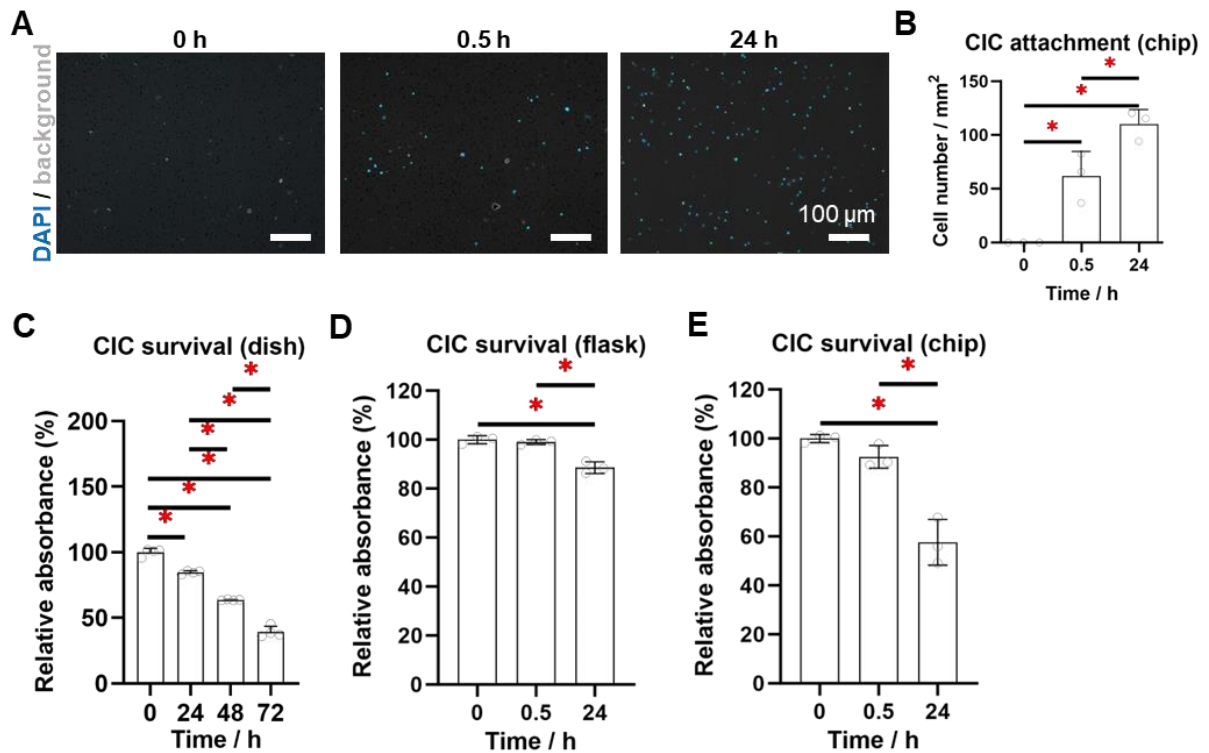

**Figure S9. CIC migration to the chip membrane and survival kinetic of primary mouse CICs.** CICs were collected from 20-week-old wild-type mice (1 mL blood/mouse) and perfused through a cell-free chip system (CICs of 200  $\mu$ L blood/chip). CIC accumulating in blank chips were recorded (A) and quantified (B) at 0, 0.5 and 24 h. (C) Survival of CIC cultivated in petri dishes was assessed at 0, 24, 48 and 72 h using the CCK-8 assay. Survival of CIC cultivated in ultra-low-attachment flasks (D) or perfused in blank chips (E) were assessed at 0, 0.5 and 24 h using the CCK-8 assay. Sample size: (A, B)  $n = 3$  per group, (C-E)  $n = 4$  per group. Abbreviations: CIC: circulating immune cell; LoC: liver-on-a-chip. One-way ANOVA and Tukey's multiple comparison were performed.  $*p < 0.05$  as indicated.



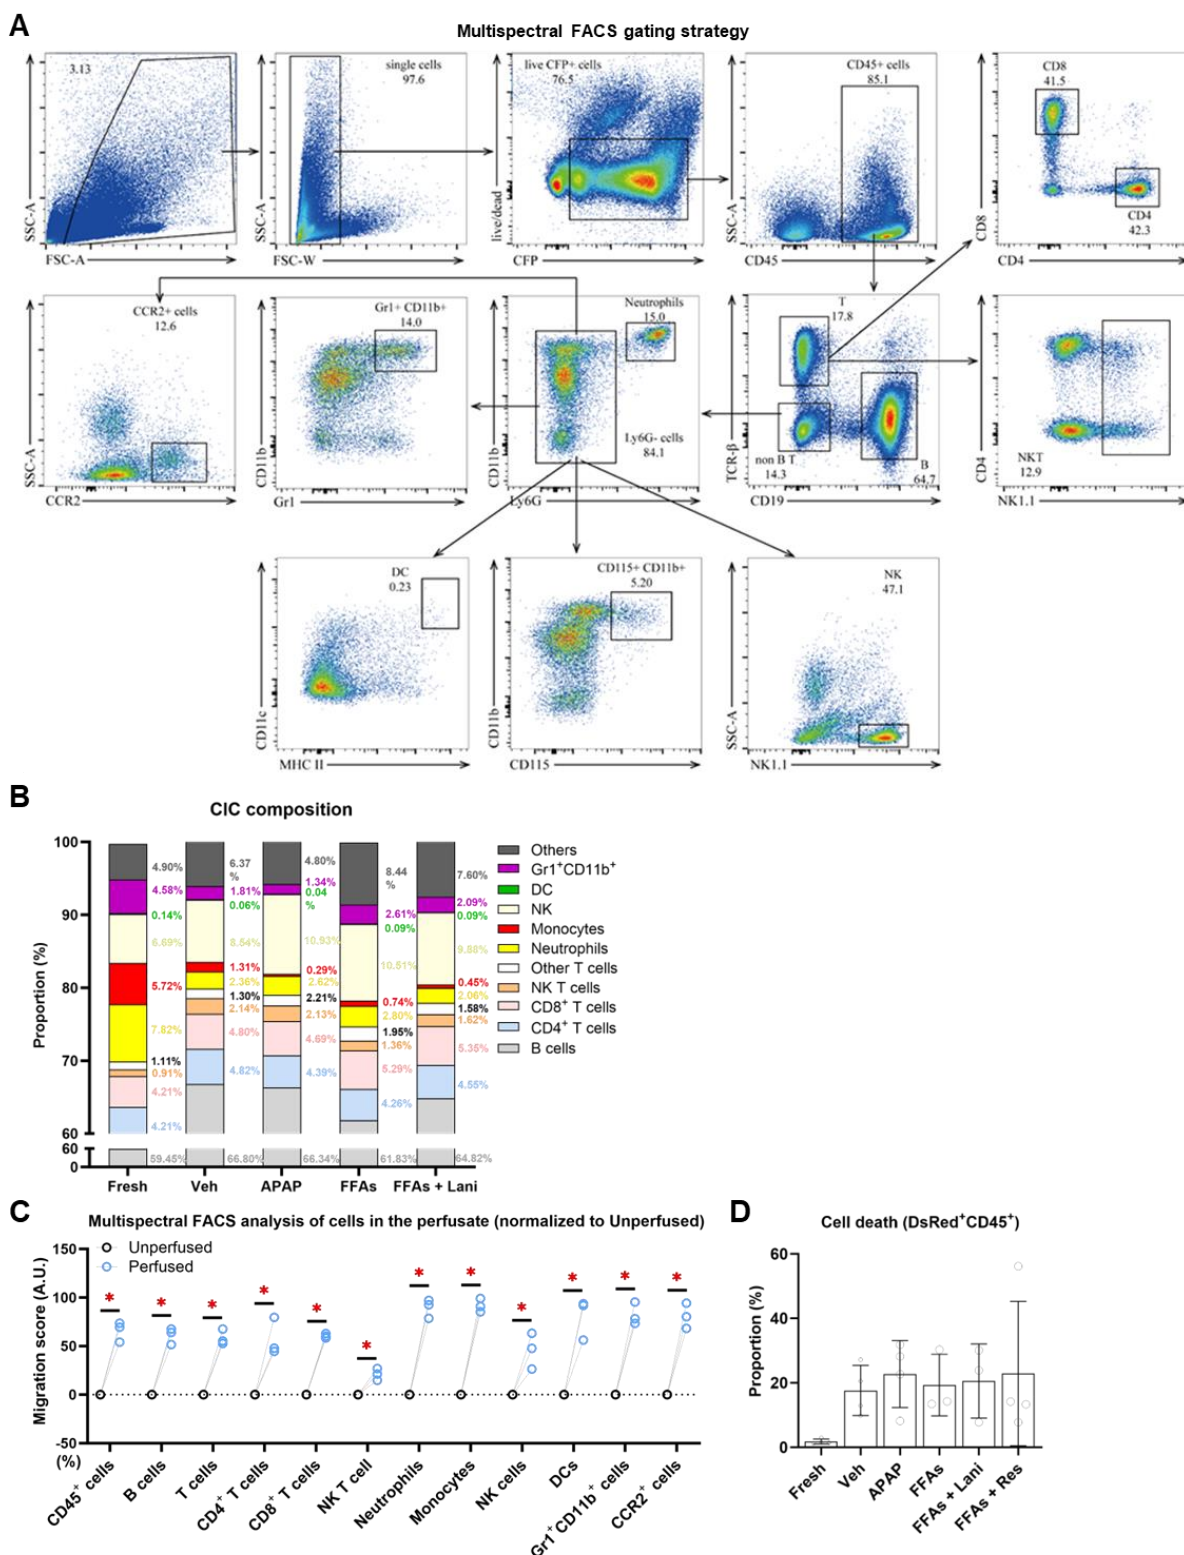

**Figure S10. Multispectral flow cytometry to decipher the immune cell migration to the LoC.** CICs were isolated from healthy mouse blood and analyzed by flow cytometry either before or after perfusion into the LoC. **(A)** Gating strategy used to identify the distinct immune cell populations. **(B)** Comparison of the relative immune cell composition between fresh (unperfused) or perfused (vehicle, APAP, FFAs and lanifibranor) CICs. **(C)** Migration scores after perfusing fresh CICs into a control LoC. **(D)** Cell death of CICs was assessed on both fresh/unperfused and perfused samples. Sample size: (B, C)  $n = 3$  per group, (D)  $n = 4$

per group. Abbreviations: APAP: acetaminophen; DCs: dendritic cells; FFAs: free fatty acids; Lani: lanifibranor; NK: natural killer. Paired student's t-tests (C) and One-way ANOVA and Tukey's multiple comparison (D) were performed. \* $p < 0.05$  as indicated.

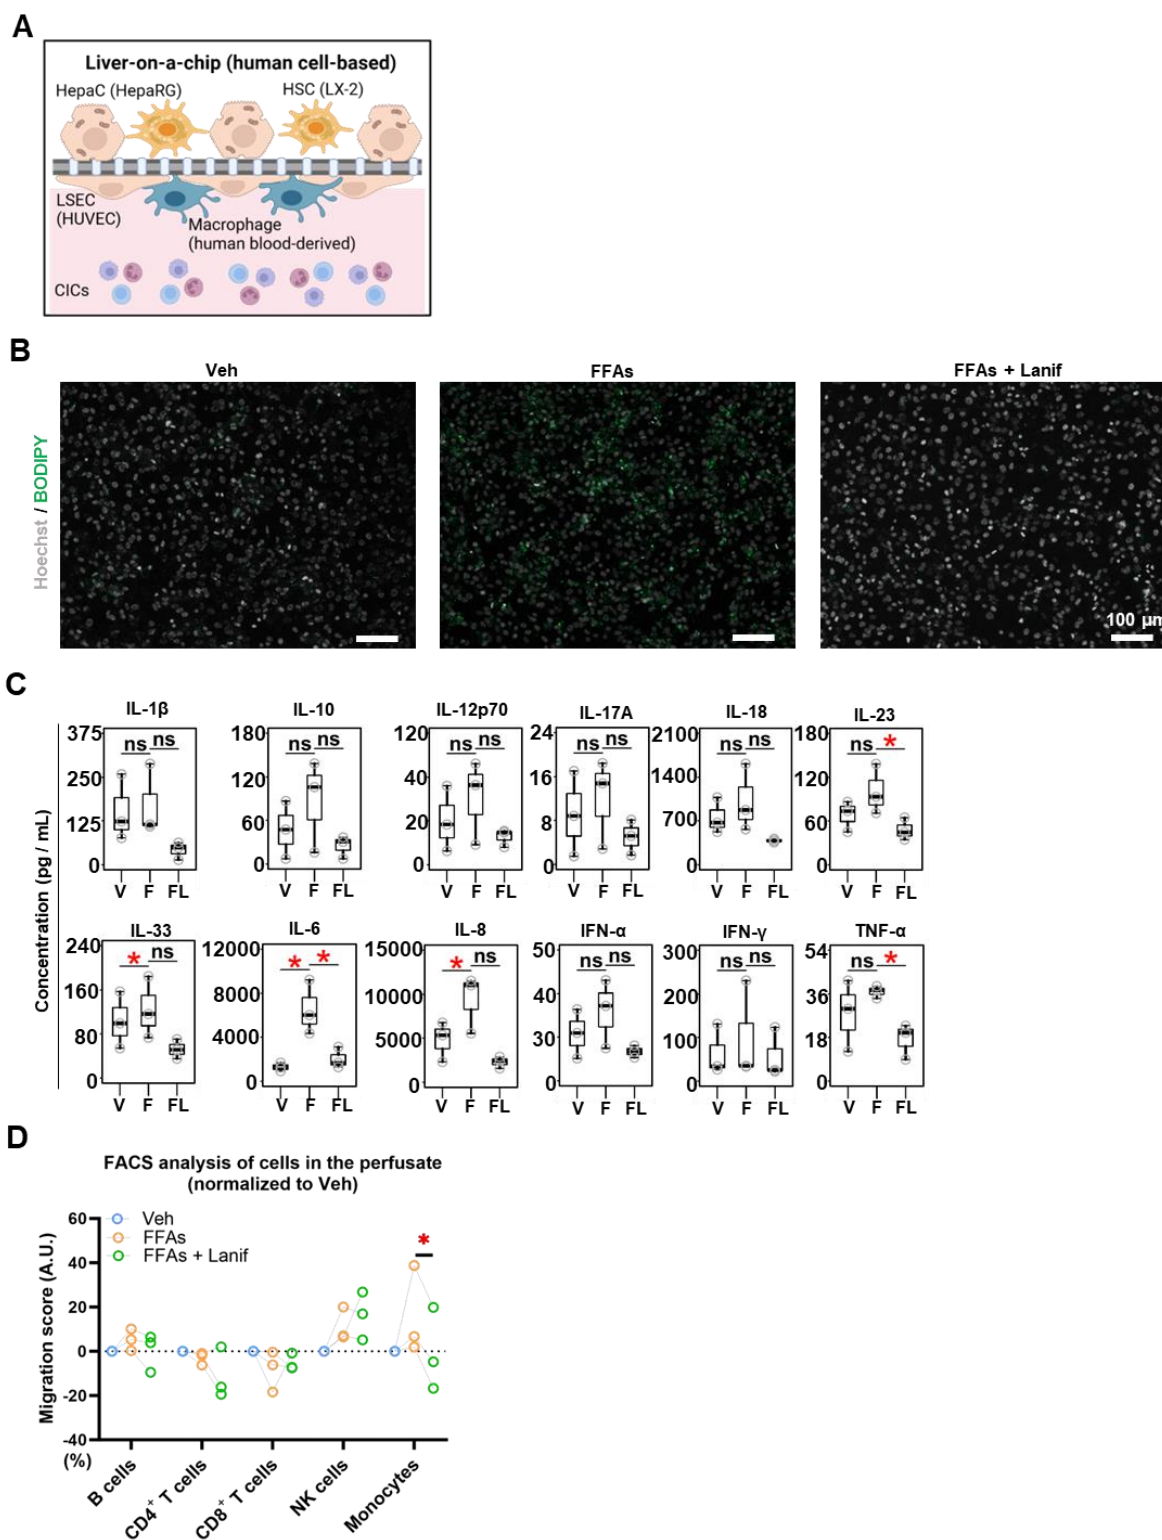

**Figure S11. Recapitulation of liver steatosis and therapeutic efficacy in the human LoC.** Human cell lines and primary blood cells were isolated and seeded in the human LoC. Liver steatosis and therapeutic efficacy were demonstrated upon vehicle, FFAs and FFAs + lanifibranor treatments. (A) Scheme of human LoC. (B) Lipid vesicle accumulation in LoC

hepatocytes was verified by BODIPY. **(C)** Circulating cytokine levels measured in the perfusate from the LoC exposed to FFAs and lanifibranor. **(D)** CIC depletion from the LoC perfusate after FFA ± lanifibranor treatment is shown for the respective immune cell types. Sample size: n = 3 per group. Abbreviations: F or FFAs: free fatty acids; FL or FFAs + Lanif: free fatty acids plus lanifibranor; FACS: fluorescence-activated cell sorting; IFN: interferon; IL: interleukin; NK: natural killer; TNF- $\alpha/\gamma$ : tumor necrosis factor-alpha/gamma; V or Veh: vehicle. One-way ANOVA and Tukey's multiple comparison were performed. \*p<0.05 as indicated.

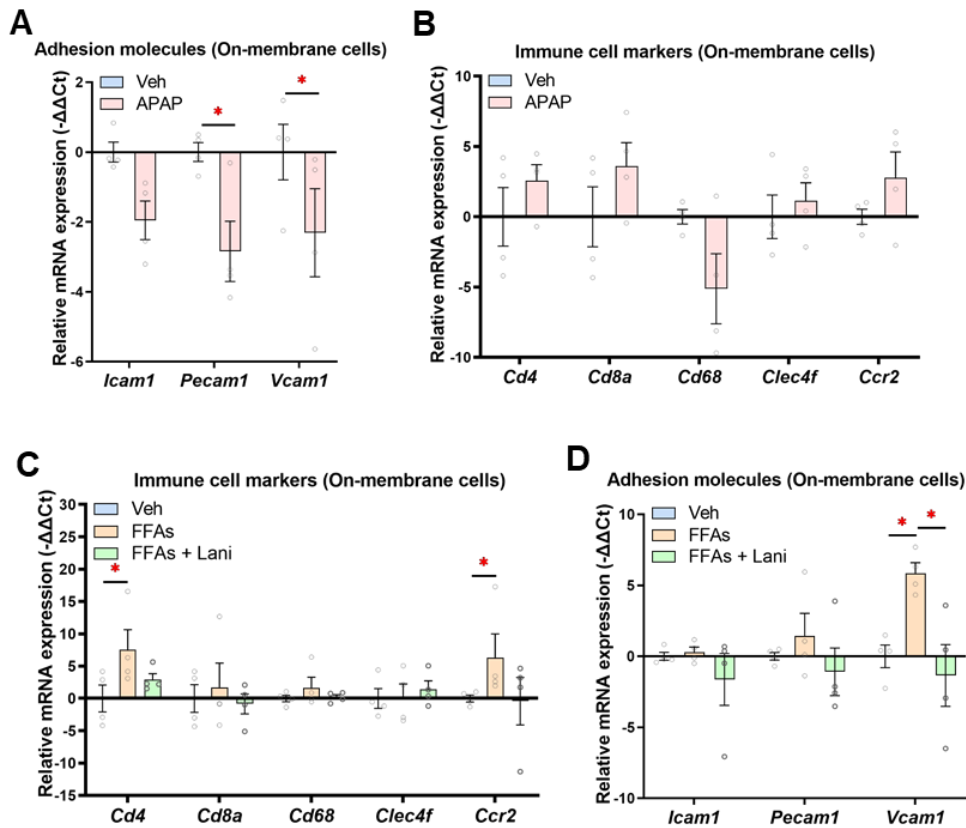

**Figure S12. Gene expression analysis to assess the immune cell migration to the LoC. (A-D)** Gene expression analysis of on-membrane cells of LoC upon APAP, FFAs and lanifibranor administration. Sample size: n = 4 per group. Abbreviations: APAP: acetaminophen; CIC: circulating immune cell; FFAs: free fatty acids; Lani: lanifibranor; Veh: vehicle. Unpaired student's t-tests were performed.

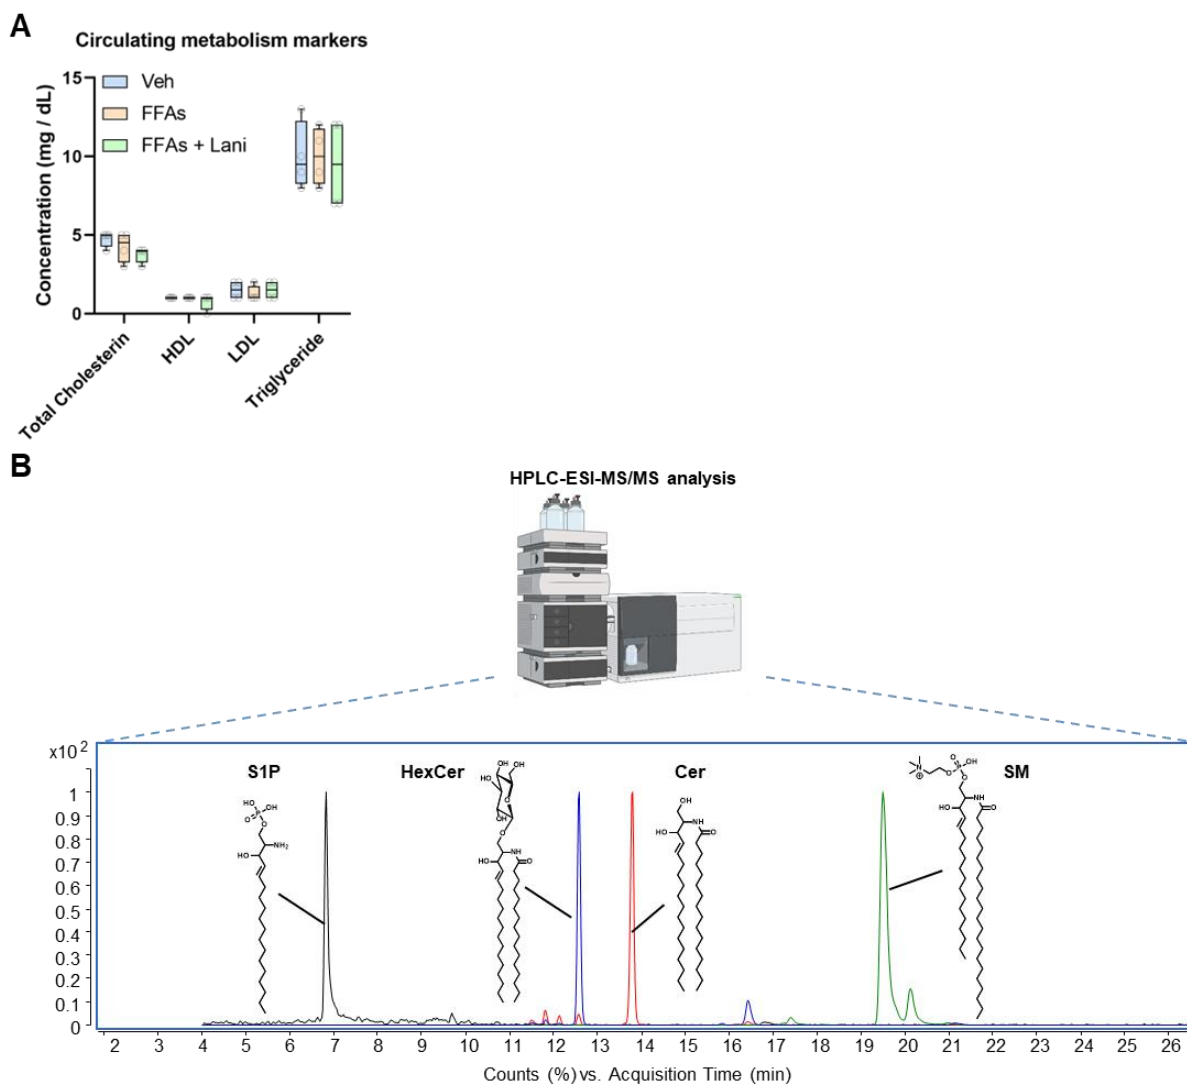

**Figure S13. Lipid metabolites measurement in LoC.** (A) Concentrations of total cholesterol, HDL-cholesterol, LDL-cholesterol and triglyceride were measured upon APAP, FFAs, and lanifibranor administration. (B) Technical procedure of sphingolipid measurement was depicted. Sample size: (A)  $n = 4$  per group. Abbreviations: Res: resmetirom; HDL: high-density lipoprotein; LDL: low-density lipoprotein. One-way ANOVA and Tukey's multiple comparison were performed.

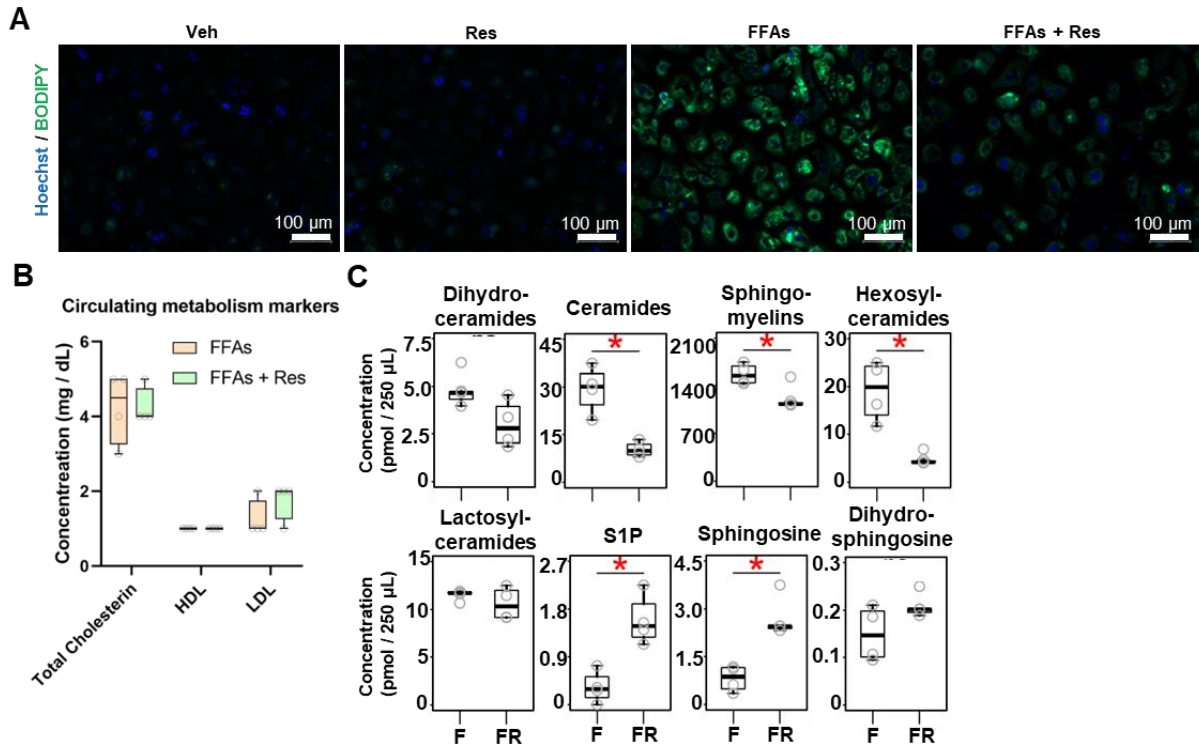

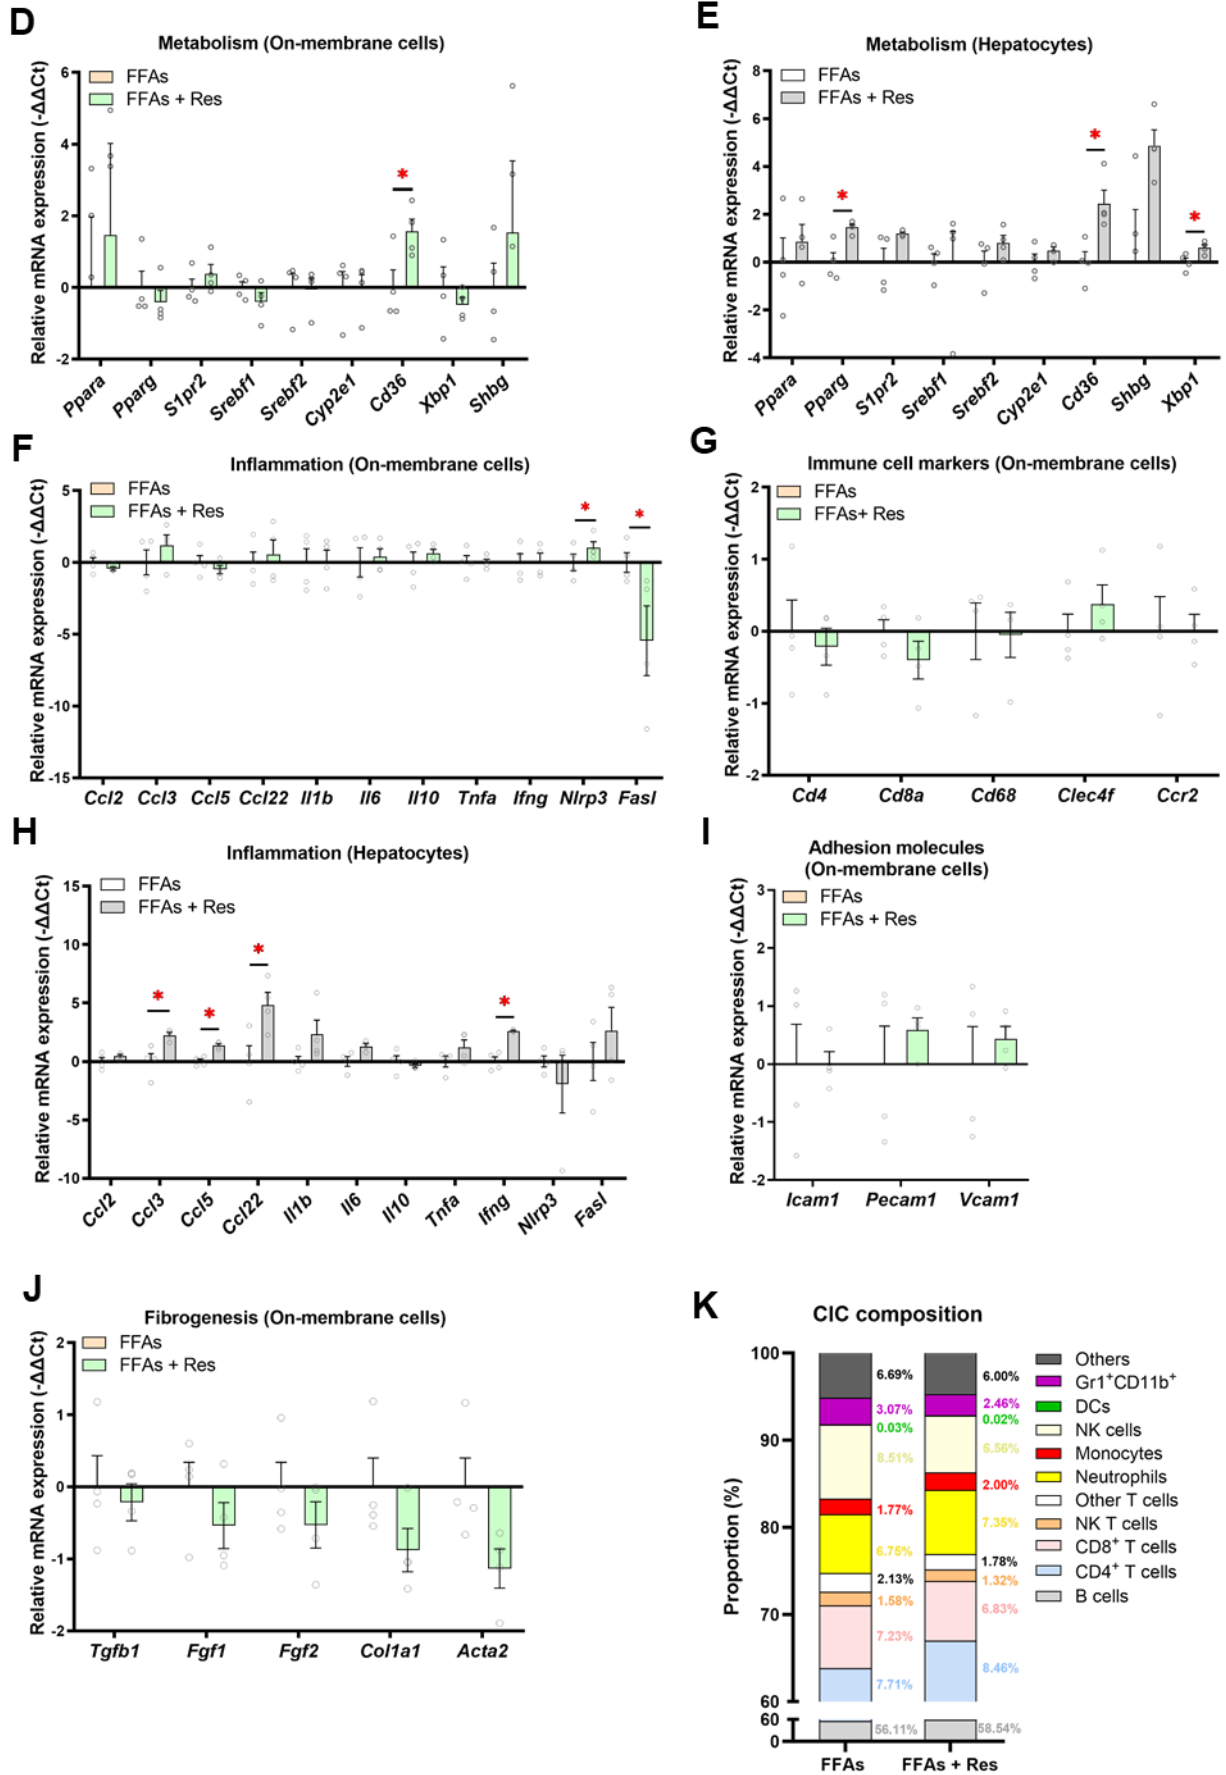



**Figure S14. Resmetirom effects on primary hepatocyte culture.** Primary mouse hepatocytes were cultured in a conventional 2-dimensional system, in the presence or absence of FFAs and resmetirom. Lipid vesicle accumulation was (A) visualized by BODIPY. (B) Concentrations of total cholesterol, HDL and LDL were measured upon FFAs and resmetirom administration. (C) Sphingolipids were measured in the LoC perfusate by HPLC-ESI-MS/MS. (D-J) Metabolism, inflammation, adhesion molecule and fibrogenesis-related gene expressions were assessed as indicated, either on the LoC or on conventional hepatocyte cultures. (K) Comparison of the relative immune cell composition between FFAs and FFAs + resmetirom. Sample size: n = 4 per group. Abbreviations: FFAs: free fatty acids; Res: resmetirom; Veh: vehicle; ALB: albumin; IL: interleukin; CCL: chemokine (C-C motif) ligand; Ifn: interferon; Tnfa: tumor necrosis factor-alpha; Nlrp3: NLR family pyrin domain containing 3; FasL: FAS ligand; PPAR: peroxisome proliferator activated receptor; S1PR2: sphingosine 1-phosphate receptor 2; Cyp2e1: cytochrome P450 family 2 subfamily E member 1; Srebf: sterol regulatory element-binding transcription factor. Unpaired student's t-tests were performed. \*p<0.05 as indicated.

## Supplementary Tables

**Table S1. Antibodies, dyes and microbeads**

| Type                         | Name                                                | Manufacturer   | Catalog No. | Antibody clone | Clone       | Host species | Dilution |
|------------------------------|-----------------------------------------------------|----------------|-------------|----------------|-------------|--------------|----------|
| Primary antibody (ICC/IHC)   | Anti-CYP450-2E1                                     | Abcam          | ab28146     | Polyclonal     | -           | Rabbit       | 1/200    |
|                              | Anti-Cytokeratin-19                                 | DSHB           | TROMA-III   | Monoclonal     | RlgG2a      | Rat          | 1/200    |
|                              | Anti-CD68                                           | Abcam          | ab237968    | Monoclonal     | FA-11       | Rat          | 1/200    |
|                              | Anti-LYVE1                                          | Abcam          | ab14917     | Polyclonal     | -           | Rabbit       | 1/200    |
|                              | Anti-Collagen-I                                     | Abcam          | ab270993    | Monoclonal     | EPR24331-53 | Rabbit       | 1/200    |
|                              | Anti-CD3                                            | Abcam          | ab16669     | Monoclonal     | SP7         | Rabbit       | 1/500    |
|                              | Anti-CD11b                                          | Abcam          | ab133357    | Monoclonal     | EPR1344     | Rabbit       | 1/1000   |
|                              | Anti-CD45R (B220)                                   | BioLegend      | 103202      | Monoclonal     | RA3-6B2     | Rat          | 1/200    |
|                              | Anti-CLEC4F                                         | R&D            | MAB2784     | Monoclonal     | 370901      | Rat          | 1/500    |
|                              | Anti-Cytokeratin-7                                  | Abcam          | ab181598    | Monoclonal     | EPR17078    | Rabbit       | 1/500    |
|                              | Anti-IBA1                                           | VWR            | 100369-764  | Monoclonal     | -           | Rabbit       | 1/500    |
|                              | Anti-MPO                                            | Abcam          | ab208670    | Monoclonal     | EPR20257    | Rabbit       | 1/1000   |
|                              | Anti-PCNA                                           | Abcam          | ab29        | Monoclonal     | PC10        | Mouse        | 1/3000   |
| Anti-PDGF-R $\beta$          | Abcam                                               | ab32570        | Monoclonal  | Y92            | Rabbit      | 1/200        |          |
| Type                         | Name                                                | Manufacturer   | Catalog No. | Host species   | Dilution    |              |          |
| Secondary antibody (ICC/IHC) | Mouse IgG, Alexa Fluor 555                          | Cell Signaling | 4409S       | Goat           | 1/500       |              |          |
|                              | Mouse IgG, Alexa Fluor 647                          | Cell Signaling | 4410S       | Goat           | 1/500       |              |          |
|                              | Rabbit IgG, Alexa Fluor 647                         | Cell Signaling | 4414S       | Goat           | 1/500       |              |          |
|                              | Rabbit IgG, Alexa Fluor 750                         | ThermoFisher   | A-21039     | Goat           | 1/500       |              |          |
|                              | Rat IgG, Alexa Fluor 488                            | Cell Signaling | 4416S       | Goat           | 1/500       |              |          |
|                              | Rat IgG, Alexa Fluor 647                            | Cell Signaling | 4418S       | Goat           | 1/500       |              |          |
| Type                         | Name                                                | Manufacturer   | Catalog No. | Antibody clone | Clone       | Host species |          |
| Antibodies (Flow cytometry)  | CD11b Monoclonal Antibody (M1/70), eFluor™ 450      | Invitrogen     | 48-0112-82  | Monoclonal     | M1/70       | Rat          |          |
|                              | Brilliant Violet 421™ anti-mouse CD4 Antibody       | BioLegend      | 100437      | Monoclonal     | GK1.5       | Rat          |          |
|                              | Brilliant Violet 711™ anti-mouse CD8a Antibody      | BioLegend      | 100747      | Monoclonal     | 53-6.7      | Rat          |          |
|                              | FITC anti-mouse Ly-6G Antibody                      | BioLegend      | 127605      | Monoclonal     | 1A8         | Rat          |          |
|                              | CD45 Monoclonal Antibody (30-F11), Alexa Fluor™ 532 | Invitrogen     | 58-0451-82  | Monoclonal     | 30-F11      | Rat          |          |
|                              | PE anti-mouse CD115 (CSF-1R) Antibody               | BioLegend      | 165003      | Monoclonal     | W19330C     | Rat          |          |

|             |                                                        |                     |                    |            |             |       |
|-------------|--------------------------------------------------------|---------------------|--------------------|------------|-------------|-------|
|             | PE/Cyanine5 anti-mouse CD19 Antibody                   | BioLegend           | 115509             | Monoclonal | 6D5         | Rat   |
|             | PE/Cyanine7 anti-mouse TCR $\beta$ chain Antibody      | BioLegend           | 109221             | Monoclonal | H57-597     | Rat   |
|             | Alexa Fluor® 700 anti-mouse CD11c Antibody             | BioLegend           | 117319             | Monoclonal | N418        | Rat   |
|             | APC/Cyanine7 anti-mouse NK-1.1 Antibody                | BioLegend           | 108723             | Monoclonal | PK136       | Rat   |
|             | APC/Fire™ 810 anti-mouse Ly-6G/Ly-6C (Gr-1) Antibody   | BioLegend           | 108469             | Monoclonal | RB6-8C5     | Rat   |
|             | PE/Fire™ 810 anti-mouse I-A/I-E Antibody               | BioLegend           | 107667             | Monoclonal | M5/114.15.2 | Rat   |
|             | APC anti-mouse CD192 (CCR2) Antibody                   | BioLegend           | 150627             | Monoclonal | SA203G11    | Rat   |
|             | PE Anti-HLA DR + DP + DQ antibody                      | Abcam               | ab23901            | Monoclonal | WR18        | Mouse |
|             | APC - CD45 Antibody, anti-human, VioGreen™, REAfinity™ | Melny               | 130-110-638        | Monoclonal | REA747      | Mouse |
|             | BD Horizon™ BV650 Mouse Anti-Human CD3                 | BD Horizon™         | 563916             | Monoclonal | SP34-2      | Mouse |
|             | BD Pharmingen™ FITC Mouse Anti-Human CD4               | BD Pharmingen™      | 561005             | Monoclonal | RPA-T4      | Mouse |
|             | Brilliant Violet 785™ anti-human CD8 Antibody          | BioLegend           | 344740             | Monoclonal | SK1         | Mouse |
|             | BD Pharmingen™ APC-Cy™7 Mouse Anti-Human CD19          | BD Pharmingen™      | 561743             | Monoclonal | SJ25C1      | Mouse |
|             | BD Pharmingen™ PE-Cy™7 Mouse Anti-Human CD56 (NCAM-1)  | BD Pharmingen™      | 557747             | Monoclonal | B159        | Mouse |
| <b>Type</b> | <b>Name</b>                                            | <b>Manufacturer</b> | <b>Catalog No.</b> |            |             |       |
| Cell dyes   | Zombie NIR™ Fixable Viability Kit                      | BioLegend           | 423105             |            |             |       |
|             | Hoechst 33342                                          | Thermo Fisher       | 62249              |            |             |       |
|             | DAPI                                                   | Thermo Fisher       | D21490             |            |             |       |
|             | BODIPY 505/515                                         | Thermo Fisher       | D3921              |            |             |       |
|             | CellMask plasma membrane stain kit                     | Thermo Fisher       | C37608             |            |             |       |
|             | Apoptosis/ Necrosis Assay Kit                          | Abcam               | ab176749           |            |             |       |

|                    |                                     |                     |                    |
|--------------------|-------------------------------------|---------------------|--------------------|
|                    | Oil Red O                           | Sigma               | O0625              |
| <b>Type</b>        | <b>Name</b>                         | <b>Manufacturer</b> | <b>Catalog No.</b> |
| Microbeads (MACS)  | Mouse anti-F4/80 Microbeads         | Milteny             | 5210707948         |
|                    | Mouse anti-CD146 Microbeads         | Milteny             | 5190725032         |
|                    | Mouse anti-CD326 (EpCAM) Microbeads | Milteny             | 70285065-00        |
| <b>Type</b>        | <b>Target</b>                       | <b>Manufacturer</b> |                    |
| Beads (LEGENDplex) | IL-23                               | BioLegend           |                    |
|                    | IL-1 $\alpha$                       | BioLegend           |                    |
|                    | IFN- $\gamma$                       | BioLegend           |                    |
|                    | TNF- $\alpha$                       | BioLegend           |                    |
|                    | MCP-1                               | BioLegend           |                    |
|                    | IL-12p70                            | BioLegend           |                    |
|                    | IL-1 $\beta$                        | BioLegend           |                    |
|                    | IL-10                               | BioLegend           |                    |
|                    | IL-6                                | BioLegend           |                    |
|                    | IL-8                                | BioLegend           |                    |
|                    | IL-27                               | BioLegend           |                    |
|                    | IL-33                               | BioLegend           |                    |
|                    | IL-17A                              | BioLegend           |                    |
|                    | IFN- $\beta$                        | BioLegend           |                    |
| GM-CSF             | BioLegend                           |                     |                    |



**Table S2: Primers used in this study.**

Supplementary table 2.

Sequences of mouse primers

| Genes          | Forward 5'-3'              | Reverse 5'-3'             |
|----------------|----------------------------|---------------------------|
| <i>Acta2</i>   | TGACAGAGGCACCACTGAACC      | TCCAGAGTCCAGCACAAATACCAGT |
| <i>Actb</i>    | CTCTAGACTTCGAGCAGGAGATGG   | ATGCCACAGGATTCCATACCCAAGA |
| <i>Ccl2</i>    | GTG TTG GCT CAG CCA GAT GC | GACACCTGCTGCTGGTGTATCC    |
| <i>Ccl22</i>   | CCGCAAGCCTGGCGTTGTTTTG     | GGGCTTGCTGAGCCTCCCTG      |
| <i>Ccl3</i>    | ACCATGACACTCTGCAACCAAG     | TCTGCCGGTTTCTCTTAGTCAGG   |
| <i>Ccl5</i>    | CTGCTGCTTTGCCTACCTCTCC     | GGCACACACTTGGCGGTTCC      |
| <i>Ccr2</i>    | TCGCTGTAGGAATGAGAAGAAGAGG  | CAAGGATTCTGGAAGGTGGTCAA   |
| <i>Cd36</i>    | TGAATGGTTGAGACCCCGTG       | CGTGGCCCCGTTTCTACTAAT     |
| <i>Cd4</i>     | GGCCAGAGGCTCAGATTC         | CAAGCGCCTAAGAGAGATG       |
| <i>Cd68</i>    | ACCGCTTATAGCCCAAGGA        | GGCAGGGTTATGAGTGACAG      |
| <i>Cd8a</i>    | AGTCCTTCAGAAAGTGAACCTCTAC  | CCGACAATCTTCTGGTCTC       |
| <i>Clec4f</i>  | TTTGTGGTGGCTTCACAG         | GATTGTCTGTGTCAGAGTTG      |
| <i>Col1a1</i>  | TCTGACTGGAAGAGCGGAGAG      | GGCACAGACGGCTGAGTAGG      |
| <i>Cyp2e1</i>  | ATAGAAGTTGGAACCTGCC        | CTTTGCCAACTTGGTTAAAGAC    |
| <i>Fasl</i>    | GTGGCCCATTTAACAGGGAACC     | CTCCAGAGATCAGAGCGGTTCC    |
| <i>Fgf1</i>    | TTATACGGCTCGCAGACAC        | TGCTTCTTGAGGTTGTAAGTG     |
| <i>Fgf2</i>    | CGACCCACACGTCAAACCTAC      | GCACACACTCCCTTGATAGAC     |
| <i>Icam1</i>   | CATCACCGTGTATTCTGTTTC      | GTGAGGTCCTTGCCTACTTG      |
| <i>Ifng</i>    | GGAGGAACTGGCAAAAGGATGG     | TGTTGCTGATGGCCTGATTGTC    |
| <i>Il10</i>    | GGCTGAGGCGCTGTCAATCG       | TCATTCATGGCCTTGTAGACACC   |
| <i>Il1b</i>    | GAGCTGAAAGCTCTCCACCTC      | CTTTCCTTTGAGGCCCAAGGC     |
| <i>Il6</i>     | GCTACCAAACCTGGATATAATCAGGA | CCAGGTAGCTATGGTACTCCAGAA  |
| <i>Nlrp3</i>   | TGGGTTCTGGTCAGACACGAG      | GGGGCTTAGGTCCACACAGAAA    |
| <i>Pecam1</i>  | GAAGGTGCATGGCGTATC         | TTCTTGCAAGGAACAATTGAC     |
| <i>Ppara</i>   | TGCCTTCCCTGTGAACTGAC       | TTCGCCGAAAGAAGCCCTTA      |
| <i>Pparg</i>   | ACCTCTGCTGGGGATCTGAA       | GCCCAAACCTGATGGCATTG      |
| <i>S1pr2</i>   | CAACTCCGGGACATAGACCG       | CATGGGGCTGAGCACTGG        |
| <i>Shbg</i>    | CCTCACCAAATCAGCAAACCC      | CCCCCTAGTGCAATCCTCAT      |
| <i>Srebp1c</i> | GGAGCCATGGATTGCACATT       | GCTTCCAGAGAGGAGGCCAG      |
| <i>Srebp2</i>  | CCCTTGACTTCTTGTGCTGCA      | GCGTGAGTGTGGGCGAATC       |
| <i>Tgfb1</i>   | GCTCGCTTTGTACAACAGCACC     | GCGGTCCACCATTAGCAGG       |
| <i>Tnfa</i>    | ACCACGCTCTTCTGTCTACTGA     | TCCACTTGGTGGTTTGCTACG     |
| <i>Vcam1</i>   | TGTTTGCAGTCTCTCAAGC        | GGCTGTCTATCTGGGTTCTC      |
| <i>Xbp1</i>    | GAAAGCGCTGCGGAGGAAA        | CATAGTCTGAGTGCTGCGGA      |
